# Supplementary material for: Heavy metalla vinyl-cations show metal–Lewis acid cooperativity in reaction with small molecules (NH3, N2H4, H2O, H2)
Source: Royal Society of Chemistry journal article supplement (doi:10.1039/d2sc05620h), 2022-11-24
Supplement: d2sc05620h1.pdf [file d2sc05620h1.pdf]

## Supporting Information A

### Content

|                                                                                                                                               |    |
|-----------------------------------------------------------------------------------------------------------------------------------------------|----|
| General information.....                                                                                                                      | 2  |
| NMR spectroscopy. ....                                                                                                                        | 2  |
| IR spectroscopy. ....                                                                                                                         | 3  |
| Crystal structure determination.....                                                                                                          | 3  |
| Syntheses.....                                                                                                                                | 3  |
| Synthesis of (Me <sub>3</sub> P) <sub>4</sub> IrH. ....                                                                                       | 3  |
| Synthesis of TbbGe(Br)=IrH(PMe <sub>3</sub> ) <sub>3</sub> ( <b>1</b> ). ....                                                                 | 3  |
| Synthesis of TbbSn(Br)=IrH(PMe <sub>3</sub> ) <sub>3</sub> ( <b>2</b> ). ....                                                                 | 4  |
| Synthesis of [TbbGeIrH(PMe <sub>3</sub> ) <sub>3</sub> ][BAR <sup>F</sup> <sub>4</sub> ] ( <b>3</b> ). ....                                   | 4  |
| Synthesis of [Ar*GeIrH(PMe <sub>3</sub> ) <sub>3</sub> ][BAR <sup>F</sup> <sub>4</sub> ] ( <b>3'</b> ).....                                   | 4  |
| Synthesis of [TbbSnIrH(PMe <sub>3</sub> ) <sub>3</sub> ][BAR <sup>F</sup> <sub>4</sub> ] ( <b>4</b> ). ....                                   | 5  |
| Synthesis of [Ar*SnIrH(PMe <sub>3</sub> ) <sub>3</sub> ][BAR <sup>F</sup> <sub>4</sub> ] ( <b>4'</b> ). ....                                  | 5  |
| Synthesis of [TbbGe(NH <sub>2</sub> )IrH <sub>2</sub> (PMe <sub>3</sub> ) <sub>3</sub> ][BAR <sup>F</sup> <sub>4</sub> ] ( <b>5</b> ). ....   | 6  |
| Reaction of <b>4</b> with an excess NH <sub>3</sub> ( <b>6*</b> ).....                                                                        | 7  |
| Synthesis of [TbbGe(NHNH <sub>2</sub> )IrH <sub>2</sub> (PMe <sub>3</sub> ) <sub>3</sub> ][BAR <sup>F</sup> <sub>4</sub> ] ( <b>7</b> ). .... | 7  |
| Synthesis of [TbbSn(NHNH <sub>2</sub> )IrH <sub>2</sub> (PMe <sub>3</sub> ) <sub>3</sub> ][BAR <sup>F</sup> <sub>4</sub> ] ( <b>8</b> ). .... | 7  |
| Synthesis of [TbbGe(OH)IrH <sub>2</sub> (PMe <sub>3</sub> ) <sub>3</sub> ][BAR <sup>F</sup> <sub>4</sub> ] ( <b>9</b> ). ....                 | 8  |
| Synthesis of [TbbSn(OH)IrH <sub>2</sub> (PMe <sub>3</sub> ) <sub>3</sub> ][BAR <sup>F</sup> <sub>4</sub> ] ( <b>10</b> ). ....                | 8  |
| Synthesis of [TbbGe(X)IrH <sub>2</sub> (PMe <sub>3</sub> ) <sub>3</sub> ][BAR <sup>F</sup> <sub>4</sub> ] ( <b>11a, 11b</b> ). ....           | 9  |
| Synthesis of [TbbSn(X)IrH <sub>2</sub> (PMe <sub>3</sub> ) <sub>3</sub> ][BAR <sup>F</sup> <sub>4</sub> ] ( <b>12a, 12b</b> ). ....           | 9  |
| Synthesis of [TbbGe(H)IrH <sub>2</sub> (PMe <sub>3</sub> ) <sub>3</sub> ][BAR <sup>F</sup> <sub>4</sub> ] ( <b>13</b> ). ....                 | 10 |
| Synthesis of [TbbSnIr(μ-H <sub>3</sub> )(PMe <sub>3</sub> ) <sub>3</sub> ][BAR <sup>F</sup> <sub>4</sub> ] ( <b>14</b> ). ....                | 10 |
| Synthesis of [TbbSn(H)IrH <sub>2</sub> (PMe <sub>3</sub> ) <sub>3</sub> ][BAR <sup>F</sup> <sub>4</sub> ] ( <b>15</b> ). ....                 | 11 |
| TbbGeHIrH(PMe <sub>3</sub> ) <sub>3</sub> ( <b>16</b> ). ....                                                                                 | 11 |
| TbbGeIrH <sub>2</sub> (PMe <sub>3</sub> ) <sub>3</sub> ( <b>17</b> ). ....                                                                    | 12 |
| Synthesis of TbbSnIrH <sub>2</sub> (PMe <sub>3</sub> ) <sub>3</sub> ( <b>18</b> ).....                                                        | 12 |
| Synthesis of TbbSnIrH <sub>2</sub> (PEt <sub>3</sub> ) <sub>3</sub> ( <b>19</b> ).....                                                        | 12 |
| Synthesis of TbbSnIrH <sub>2</sub> (CO)(PEt <sub>3</sub> ) <sub>2</sub> ( <b>20</b> ). ....                                                   | 13 |
| Synthesis of TbbSnH <sub>2</sub> Ir(CO) <sub>2</sub> (PEt <sub>3</sub> ) <sub>2</sub> ( <b>21</b> ). ....                                     | 13 |
| References.....                                                                                                                               | 15 |

## Experimental

### General information.

All manipulations were carried out under argon (99.999 %) atmosphere using standard Schlenk techniques or an MBraun Glovebox. The argon for Schlenk techniques is additionally dried through SICAPENT®. All solvents (protonated and deuterated) were degassed via “freeze-pump-thaw” method and dried with diverse methods. Benzene and *o*-DFB were dried over activated aluminium oxide, before this benzene-*d*<sub>6</sub> is additionally distilled from Na/K. Diethyl ether and tetrahydrofuran were obtained from an MBRAUN solvent purification system (SPS) and distilled from Na/K. Toluene, obtained from an MBRAUN SPS, and toluene-*d*<sub>8</sub> are distilled from Na/K. *n*-hexane and *n*-pentane were obtained from an MBRAUN SPS. 1-bromo-4-(*tert*-butyl)-2,6-bis[bis(trimethylsilyl)methyl]benzene (TbbBr)<sup>1-2</sup>, [TbbGeBr]<sub>2</sub><sup>3</sup>, [TbbSnBr<sub>2</sub>][Li(thf)<sub>2</sub>]<sup>4</sup>, TbbSnH<sub>3</sub><sup>4</sup>, [Ar\*PbH]<sub>2</sub><sup>5-6</sup>, Tris(triethylphosphine)iridiumchloride (Et<sub>3</sub>P)<sub>3</sub>IrCl)<sup>7</sup>, Tetrakis(trimethylphosphine)iridiumchloride ((Me<sub>3</sub>P)<sub>4</sub>IrCl)<sup>8</sup>, sodium tetrakis[3,5-bis(trifluoromethyl)phenyl]borate (Na[BAr<sup>F</sup><sub>4</sub>])<sup>9</sup> and *Brookhart's acid*<sup>10</sup> were synthesized following the respective literature. The commercially purchased chemicals (*sigma aldrich*, *abcr* and *apollo scientific*) were used as received. All air and moisture sensitive chemicals were stored under argon atmosphere.

### NMR spectroscopy.

The NMR spectra were recorded with either a *Bruker Avance III HD 300 NanoBay* NMR spectrometer equipped with a 5 mm BBFO probe head operating at 300.13 (<sup>1</sup>H), 96.29 (<sup>11</sup>B), 75.48 (<sup>13</sup>C) 282.40 (<sup>19</sup>F), 59.62 (<sup>29</sup>Si) and 111.92 MHz (<sup>119</sup>Sn), a *Bruker Avance II+ 400* NMR spectrometer equipped with a 5 mm QNP (quad nucleus probe) head operating at 400.11 (<sup>1</sup>H), 100.62 (<sup>13</sup>C), 376.43 MHz (<sup>19</sup>F), 161.97 MHz (<sup>31</sup>P), a *Bruker AV II+ 500* NMR spectrometer with a variable temperature set up and with a 5 mm ATM probe head or a 5 mm TBO probe head operating at 500.13 (<sup>1</sup>H), 160.46 (<sup>11</sup>B) 125.76 (<sup>13</sup>C), 99.36 (<sup>29</sup>Si), 202.46 (<sup>31</sup>P), 186.55 MHz (<sup>119</sup>Sn) or a *Bruker Avance III HDX 600* spectrometer with a variable temperature set up and a 5 mm Prodigy BBO Cryo probe head operating at 600.13 (<sup>1</sup>H), 192.55 (<sup>11</sup>B), 150.92 (<sup>13</sup>C) 564.63 (<sup>19</sup>F), 119.23 (<sup>29</sup>Si) and 223.79 MHz (<sup>119</sup>Sn). The chemical shifts are reported as δ in ppm relative to the following external standards: tetramethylsilane (<sup>1</sup>H, <sup>13</sup>C and <sup>29</sup>Si), lithium chloride (<sup>7</sup>Li), boron trifluoride diethyl etherate (<sup>11</sup>B), trichlorofluoromethane (<sup>19</sup>F), 85% phosphoric acid (<sup>31</sup>P) and tetramethyltin (<sup>119</sup>Sn).<sup>11</sup> The chemical shifts were referenced using the chemical shift of the solvent <sup>2</sup>H resonance frequency as follows: Ξ = 32.08397 % for <sup>11</sup>B, Ξ = 25.145020 % for <sup>13</sup>C, Ξ = 94.094011 % for <sup>19</sup>F, Ξ = 19.867187 % for <sup>29</sup>Si, Ξ = 40.480742 for <sup>31</sup>P and Ξ = 37.290632 % for <sup>119</sup>Sn.<sup>11</sup> The multiplicity of the signals is abbreviated as s = singlet, d = doublet, t = triplet, q = quartet, quint = quintet and m = multiplet or br. = broad/unresolved. The proton and carbon signals were assigned via detailed analysis of <sup>1</sup>H, <sup>13</sup>C{<sup>1</sup>H}(-UDEFT), <sup>13</sup>C{<sup>1</sup>H}-DEPT135, <sup>1</sup>H-<sup>1</sup>H-COSY, <sup>1</sup>H-<sup>13</sup>C-HSQC and <sup>1</sup>H-<sup>13</sup>C-HMBC NMR spectra. Selected 1D-NMR spectra of the compounds can be found in the Supporting Information. Variable temperature NMR spectra were equilibrated for 10 min prior to acquisition, the actual temperature was determined by using the method of van Geet.<sup>12-13</sup> Spectra were analyzed using gNMR 5.0,<sup>14</sup> and analysis of exchange rates was performed with ACTPAR,<sup>15</sup> a nonlinear least-squares program that considers errors in both dimensions. The 112.01 MHz <sup>119</sup>Sn MAS solid-state NMR spectrum of **4** was obtained for a powdered sample packed into a 4 mm o.d. zirconia rotor using a Bruker Avance III HD spectrometer with a 300 MHz wide-bore magnet. Because cross-polarization was unsuccessful, direct excitation with high-power proton decoupling was employed. Sample spinning rates of 10 and 11 kHz were used to identify the isotropic peak. Chemical shifts were referenced with respect to external SnMe<sub>4</sub> (Ξ = 37.290632%) by the substitution

method: an external sample of  $\text{CHCl}_3$  in acetone was spun at 2 kHz and the external magnetic field was adjusted such that the  $^1\text{H}$  chemical shift of  $\text{CHCl}_3$  matched a predetermined chemical shift wrt. external 1% TMS in  $\text{CHCl}_3$ .

IR spectroscopy.

The IR spectra were recorded as potassium bromide pellets, which were prepared in an MBraun glovebox and measured with a *Bruker* VERTEX 70 IR spectrometer.

Crystal structure determination.

X-ray data were collected with a *Bruker* Smart APEX II diffractometer with graphite monochromated  $\text{Mo-K}_\alpha$  radiation. The used programs were *Bruker* APEX2 v2011.8-0 including SADABS for absorption correction, SAINT for data reduction, SHELXS for structure solution and SHELXL or WinGX suite of programs v1.70.01 including SHELXL for structure refinement.<sup>16-22</sup> All details of the structure refinement and solution can be found in the Supporting Information.

## Syntheses

Synthesis of  $(\text{Me}_3\text{P})_4\text{IrH}$ . The synthesis was carried out based on a literature procedure but is nevertheless described here due to other or additional observations.<sup>23</sup>  $(\text{Me}_3\text{P})_4\text{IrCl}$  (974 mg, 1.83 mmol, 1.0 equiv) is suspended in tetrahydrofuran (50.0 mL). Dihydrogen is bubbled through the orange suspension under stirring till the solid is completely colorless to yield quantitatively  $(\text{Me}_3\text{P})_4\text{IrClH}_2$  (approximately 30 to 45 minutes – it may be necessary to refill the evaporated solvent). To the resulting suspension of  $(\text{Me}_3\text{P})_4\text{IrClH}_2$  (977 mg, 1.83 mmol, 1.0 equiv) in tetrahydrofuran potassium *tert*-butoxide (324 mg, 2.74 mmol, 1.5 equiv) is added. The colorless suspension clears and turns pale yellow. After 45 minutes at room temperature the solvent is removed under reduced pressure and the resulting solid is extracted with *n*-pentane (10.0, 10.0, 7.00 mL) and filtered through a syringe filter. The solvent is removed under reduced pressure to yield 811 mg of  $(\text{Me}_3\text{P})_4\text{IrH}$  (1.63 mmol, 89 %) as a pale-yellow solid. The purity is sufficient for our reactions. *Analytical data.*  $^1\text{H}$  [400.11 MHz, 299.20 K, benzene- $\text{d}_6$ ]:  $\delta$  (ppm) –13.80 (quint, 1H, IrH,  $^2J_{31\text{P-H}} = 5.9$  Hz), 1.49 (m, 36H,  $\text{PMe}_3\text{-H}$ ).  $^{31}\text{P}\{^1\text{H}\}$  [161.97 MHz, 299.20 K, benzene- $\text{d}_6$ ]:  $\delta$  (ppm) –57.8 (s,  $\text{PMe}_3$ ).

Synthesis of  $\text{TbbGe}(\text{Br})=\text{IrH}(\text{PMe}_3)_3$  (**1**). [ $\text{TbbGeBr}$ ]<sub>2</sub> (150 mg, 125  $\mu\text{mol}$ , 1.0 equiv) and  $(\text{Me}_3\text{P})_4\text{IrH}$  (124 mg, 249  $\mu\text{mol}$ , 2.0 equiv) are weighed in and mixed up. Subsequently benzene (5.00 mL) is added and the resulting orange solution is stirred for 24 hours at room temperature. The reaction mixture is dried under reduced pressure and the orange solid is extracted three times with *n*-pentane (4.00, 4.00 and 2.00 mL) and filtered through a syringe filter. The solvent is removed under reduced pressure to yield 244 mg (238  $\mu\text{mol}$ , 96 %) orange solid of  $\text{TbbGe}(\text{Br})=\text{IrH}(\text{PMe}_3)_3$  (**1**). Suitable crystals for X-ray diffraction could be obtained out of a slowly evaporated *n*-pentane solution at –38 °C. *Analytical data.*  $^1\text{H}$  [400.11 MHz, 299.20 K, benzene- $\text{d}_6$ ]:  $\delta$  (ppm) –11.82 (q, 1H, IrH,  $^2J_{31\text{P-H}} = 20.8$  Hz), 0.34 (s, 18H,  $\text{Si}(\text{CH}_3)_3$ ), 0.43 (s, 18H,  $\text{Si}(\text{CH}_3)_3$ ), 1.37 (s, 9H,  $^t\text{Bu-H}$ ), 1.49 (m, 27H,  $\text{PMe}_3\text{-H}$ ), 3.09 (s, 2H,  $\text{CH}(\text{SiMe}_3)_2$ ), 6.85 (s, 2H, *m*-TbbH).  $^{13}\text{C}\{^1\text{H}\}$  [100.62 MHz, 299.20 K, benzene- $\text{d}_6$ ]:  $\delta$  (ppm) 1.2 (s,  $\text{Si}(\text{CH}_3)_3$ ), 1.7 (s,  $\text{Si}(\text{CH}_3)_3$ ), 26.8 (m,  $\text{P}(\text{CH}_3)_3$ ), 28.0 (s,  $\text{CH}(\text{SiMe}_3)_2$ ), 31.1 (s,  $^t\text{Bu-CH}_3$ ), 34.0 (s,  $^t\text{Bu-CMe}_3$ ), 121.8 (s, *m*-C<sub>Tbb</sub>), 144.5 (s, *o*-C<sub>Tbb</sub>), 149.3 (s, *p*-C<sub>Tbb</sub>), 157.9 (m, *i*-C<sub>Tbb</sub>-Ge).  $^{29}\text{Si}$  [59.63 MHz, 299.20 K, benzene- $\text{d}_6$ ]:  $\delta$  (ppm) 2.7 (m,  $\text{SiMe}_3$ ), 3.4 (m,  $\text{SiMe}_3$ ).  $^{31}\text{P}\{^1\text{H}\}$  [161.97 MHz, 299.20 K, benzene- $\text{d}_6$ ]:  $\delta$  (ppm) –45.6 (s,  $\text{PMe}_3$ ). IR [KBr,  $\text{cm}^{-1}$ ]  $\nu(\text{Ir-H})$  2008. **Elemental analysis** calculated for  $\text{TbbGe}(\text{Br})=\text{IrH}(\text{PMe}_3)_3$  ( $\text{C}_{33}\text{H}_{77}\text{BrGeIrP}_3\text{Si}_4$ ): C 38.71, H 7.58. Found: C 38.81, H 7.63.

Synthesis of  $\text{TbbSn}(\text{Br})=\text{IrH}(\text{PMe}_3)_3$  (**2**).  $[\text{TbbSnBr}_2][\text{Li}(\text{thf})_2]$  (200 mg, 227  $\mu\text{mol}$ , 1.0 equiv) and  $(\text{Me}_3\text{P})_4\text{IrH}$  (113 mg, 227  $\mu\text{mol}$ , 1.0 equiv) are weighed in and mixed up. Subsequently benzene (4.00 mL) is added and the resulting red suspension is stirred for one hour at room temperature. The reaction mixture is dried under reduced pressure and the orange-red solid is co-evaporated with *n*-pentane (2.00 mL) and then extracted three times with *n*-pentane (4.00, 4.00 and 2.00 mL) and filtered through a syringe filter. The solvent is removed under reduced pressure to yield 232 mg (217  $\mu\text{mol}$ , 95 %) orange solid of  $\text{TbbSn}(\text{Br})=\text{IrH}(\text{PMe}_3)_3$  (**2**). The purity is sufficient for our reactions. For higher purity the compound can be crystallized out of a concentrated *n*-pentane or toluene solution at  $-38^\circ\text{C}$ . The crystals were always twinned, which is why no X-ray molecule structure could be obtained. **Analytical data.**  $^1\text{H}$  [400.11 MHz, 299.20 K, benzene- $d_6$ ]:  $\delta$  (ppm)  $-12.65$  (q + sat., 1H, IrH,  $^2J_{119\text{Sn}-\text{H}} = 219$  Hz,  $^2J_{31\text{P}-\text{H}} = 18.6$  Hz),  $0.37$  (s, 36H, Si(CH $_3$ ) $_3$ ),  $1.36$  (s, 9H,  $^t\text{Bu}-\text{H}$ ),  $1.51$  (m, 27H,  $\text{PMe}_3-\text{H}$ ),  $2.75$  (s, 2H, CH(SiMe $_3$ ) $_2$ ),  $6.94$  (s, 2H, *m*-TbbH).  $^{13}\text{C}\{^1\text{H}\}$  [100.62 MHz, 299.20 K, benzene- $d_6$ ]:  $\delta$  (ppm)  $1.2$  (s, Si(CH $_3$ ) $_3$ ),  $28.3$  (m, P(CH $_3$ ) $_3$ ),  $30.5$  (s, CH(SiMe $_3$ ) $_2$ ),  $31.1$  (s,  $^t\text{Bu}-\text{CH}_3$ ),  $34.2$  (s,  $^t\text{Bu}-\text{CMe}_3$ ),  $122.2$  (s, *m*-C<sub>Tbb</sub>),  $146.6$  (s, *o*-C<sub>Tbb</sub>),  $149.7$  (s, *p*-C<sub>Tbb</sub>),  $167.0$  (m, *i*-C<sub>Tbb</sub>-Sn).  $^{29}\text{Si}$  [59.63 MHz, 299.20 K, benzene- $d_6$ ]:  $\delta$  (ppm)  $2.5$  (m, SiMe $_3$ ).  $^{31}\text{P}\{^1\text{H}\}$  [161.97 MHz, 299.20 K, benzene- $d_6$ ]:  $\delta$  (ppm)  $-43.7$  (s + sat.,  $\text{PMe}_3$ ,  $^2J_{119\text{Sn}-31\text{P}} = 598$  Hz).  $^{119}\text{Sn}$  [111.92 MHz, 299.20 K, benzene- $d_6$ ]:  $\delta$  (ppm)  $566$  ("dq", TbbSn(Br)Ir,  $^2J_{119\text{Sn}-31\text{P}} = 603$  Hz,  $^2J_{119\text{Sn}-1\text{H}} = 218$  Hz).  $^{119}\text{Sn}\{^1\text{H}\}$  [111.92 MHz, 299.20 K, benzene- $d_6$ ]:  $\delta$  (ppm)  $566$  ("q", TbbSn(Br)Ir,  $^2J_{119\text{Sn}-31\text{P}} = 599$  Hz). **IR** [KBr,  $\text{cm}^{-1}$ ]  $\nu(\text{Ir}-\text{H})$  2010. **Elemental analysis** calculated for  $\text{TbbSn}(\text{Br})=\text{IrH}(\text{PMe}_3)_3$  (C $_{33}\text{H}_{77}\text{BrIrP}_3\text{Si}_4\text{Sn}$ ): C 37.04, H 7.25. Found: C 37.17, H 7.25.

Synthesis of  $[\text{TbbGeIrH}(\text{PMe}_3)_3][\text{BAR}^{\text{F}}_4]$  (**3**).  $\text{TbbGe}(\text{Br})=\text{IrH}(\text{PMe}_3)_3$  (**1**) (100 mg, 97.7  $\mu\text{mol}$ , 1.0 equiv) and  $\text{Na}[\text{BAR}^{\text{F}}_4]$  (82.2 mg, 92.8  $\mu\text{mol}$ , 0.95 equiv) are weighed in and mixed up. Subsequently *o*-DFB (1.00 mL) and benzene (1.00 mL) is added, and the resulting dark red suspension is stirred for five minutes at room temperature. The reaction mixture is filtered through a syringe filter, then the filter is washed with benzene (1.00 mL) and the dark red solution is dried under reduced pressure. The resulting solid is washed three times with *n*-pentane (2.00 mL each time) and dried under reduced pressure to yield 149 mg (82.4  $\mu\text{mol}$ , 89 %) red solid of  $[\text{TbbGeIrH}(\text{PMe}_3)_3][\text{BAR}^{\text{F}}_4]$  (**3**). **Analytical data.**  $^1\text{H}$  [400.11 MHz, 299.20 K, benzene- $d_6$  + *o*-DFB]:  $\delta$  (ppm)  $-11.87$  (q, 1H, IrH,  $^2J_{31\text{P}-\text{H}} = 8.8$  Hz),  $0.07$  (s, 36H, Si(CH $_3$ ) $_3$ ),  $1.17$  (s, 9H,  $^t\text{Bu}-\text{H}$ ),  $1.37$  (m, 27H,  $\text{PMe}_3-\text{H}$ ),  $2.34$  (s, 2H, CH(SiMe $_3$ ) $_2$ ),  $6.73$  (s, 2H, *m*-TbbH, covered by *o*-DFB),  $7.62$  (br. s, 4H, *p*-BAR $^{\text{F}}$ -H),  $8.31$  (br. m, 8H, *o*-BAR $^{\text{F}}$ -H).  $^{11}\text{B}$  [96.29 MHz, 299.20 K, benzene- $d_6$  + *o*-DFB]:  $\delta$  (ppm)  $-6.0$  (s, BAR $^{\text{F}}$  $_4$ ).  $^{13}\text{C}\{^1\text{H}\}$  [100.62 MHz, 299.20 K, benzene- $d_6$  + *o*-DFB]:  $\delta$  (ppm)  $-0.1$  (s, Si(CH $_3$ ) $_3$ ),  $27.0$  (m, P(CH $_3$ ) $_3$ ),  $30.2$  (s,  $^t\text{Bu}-\text{CH}_3$ ),  $30.6$  (s, CH(SiMe $_3$ ) $_2$ ),  $34.8$  (s,  $^t\text{Bu}-\text{CMe}_3$ ),  $117.5$  (m, *p*-BAR $^{\text{F}}$ -C),  $122.3$  (s, *m*-C<sub>Tbb</sub>),  $124.9$  (q, CF $_3$ ,  $^1J_{19\text{F}-13\text{C}} = 272$  Hz),  $129.5$  (br. q, *m*-BAR $^{\text{F}}$ -C,  $^2J_{19\text{F}-13\text{C}} = 31.9$  Hz),  $135.0$  (s, *o*-BAR $^{\text{F}}$ -C),  $146.3$  (s, *o*-C<sub>Tbb</sub>),  $156.0$  (s, *p*-C<sub>Tbb</sub>),  $159.1$  (m, *i*-C<sub>Tbb</sub>-Ge),  $162.4$  (q, *i*-BAR $^{\text{F}}$ -C,  $^1J_{13\text{C}-11\text{B}} = 49.8$  Hz).  $^{19}\text{F}\{^1\text{H}\}$  [376.48 MHz, 299.20 K, benzene- $d_6$  + *o*-DFB]:  $\delta$  (ppm)  $-62.3$  (s, CF $_3$ ).  $^{29}\text{Si}$  [59.63 MHz, 299.20 K, benzene- $d_6$  + *o*-DFB]:  $\delta$  (ppm)  $3.3$  (m, SiMe $_3$ ).  $^{31}\text{P}\{^1\text{H}\}$  [161.97 MHz, 299.20 K, benzene- $d_6$  + *o*-DFB]:  $\delta$  (ppm)  $-43.9$  (br. s,  $\text{PMe}_3$ ). **Elemental analysis** calculated for  $[\text{TbbGeIrH}(\text{PMe}_3)_3][\text{BAR}^{\text{F}}_4]$  (C $_{65}\text{H}_{89}\text{BF}_{24}\text{GeIrP}_3\text{Si}_4$ ): C 43.20, H 4.96. Found: C 42.93, H 5.25.

Synthesis of  $[\text{Ar}^*\text{GeIrH}(\text{PMe}_3)_3][\text{BAR}^{\text{F}}_4]$  (**3'**). **Step 1:** To a mixture of  $[\text{Ar}^*\text{GeCl}]_2$  (29.6 mg, 25.1  $\mu\text{mol}$ , 1.0 equiv) and  $(\text{Me}_3\text{P})_4\text{IrH}$  (25.0 mg, 50.2  $\mu\text{mol}$ , 2.0 equiv) benzene (2.00 mL) is added directly. The orange-colored reaction mixture is stirred at room temperature for 24 hours. The solvent is removed under reduced pressure, and it is co-evaporated with *n*-pentane (2.00 mL). The orange solid is extracted with *n*-pentane (2 $\times$ 2.00 mL) and filtered through a syringe filter. The solvent is removed under reduced pressure to yield 47.5 mg (47.0  $\mu\text{mol}$ , 94 %) of the iridium germylene  $\text{Ar}^*\text{GeCl}=\text{IrH}(\text{PMe}_3)_3$  as an orange solid. The iridium germylene was not characterized and the crude product was reacted in the next step as follows: **Step 2:** To a mixture of  $\text{Ar}^*\text{GeClIrH}(\text{PMe}_3)_3$  (47.5 mg, 47.0  $\mu\text{mol}$ , 1.0 equiv) and  $\text{Na}[\text{BAR}^{\text{F}}_4]$  (39.5 mg, 44.6  $\mu\text{mol}$ , 0.95 equiv) *o*-DFB (0.50 mL) and benzene (0.50 mL) is added. The resulting deep red to orange-brown suspension is stirred for five minutes at room temperature. It is then filtered

through a syringe filter. The filter is washed again with benzene (0.50 mL). The solvent is removed under reduced pressure and the resulting gel-like solid is washed three times with *n*-pentane (1.00 mL) to yield 64.2 mg (34.9  $\mu$ mol, 83 %) red to orange-brown solid of [Ar\*GeIrH(PMe<sub>3</sub>)<sub>3</sub>][BAR<sup>F</sup><sub>4</sub>] (**3'**) as product. Suitable single crystals could be obtained by overlaying a concentrated *o*-DFB solution with *n*-pentane at –38 °C. *Analytical data.* <sup>1</sup>H [600.13 MHz, 299.20 K, benzene-d<sub>6</sub> + *o*-DFB]:  $\delta$  (ppm) –12.84 (q, 1H, IrH, <sup>2</sup>J<sub>31P-H</sub> = 10.3 Hz), 1.04 (d, 12H, *o*-*i*Pr-CH<sub>3</sub>, <sup>3</sup>J<sub>H-H</sub> = 6.9 Hz), 1.13 (m, 27H, PMe<sub>3</sub>-H), 1.23 (d, 12H, *o*-*i*Pr-CH<sub>3</sub>, <sup>3</sup>J<sub>H-H</sub> = 6.9 Hz), 1.24 (d, 12H, *p*-*i*Pr-CH<sub>3</sub>, <sup>3</sup>J<sub>H-H</sub> = 6.9 Hz), 2.75 (sept, 4H, *o*-*i*Pr-CH, <sup>3</sup>J<sub>H-H</sub> = 6.9 Hz), 2.81 (sept, 2H, *p*-*i*Pr-CH, <sup>3</sup>J<sub>H-H</sub> = 6.9 Hz), 6.90 and 7.21 (m [d + t], 3H, *m*-C<sub>6</sub>H<sub>3</sub> und *p*-C<sub>6</sub>H<sub>3</sub>, <sup>3</sup>J<sub>H-H</sub> = 7.7 Hz), 7.10 (s, 4H, *m*-H<sub>trip</sub>), 7.62 (br. s, 4H, *p*-BAR<sup>F</sup><sub>4</sub>-H), 8.30 (br. m, 8H, *o*-BAR<sup>F</sup><sub>4</sub>-H). <sup>11</sup>B{<sup>1</sup>H} [192.55 MHz, 299.20 K, benzene-d<sub>6</sub> + *o*-DFB]:  $\delta$  (ppm) –6.0 (s, BAR<sup>F</sup><sub>4</sub>). <sup>13</sup>C{<sup>1</sup>H} [150.90 MHz, 299.20 K, benzene-d<sub>6</sub> + *o*-DFB]:  $\delta$  (ppm) 23.6 (s, *o*-*i*Pr-CH<sub>3</sub>), 23.8 (s, *p*-*i*Pr-CH<sub>3</sub>), 24.3 (s, *o*-*i*Pr-CH<sub>3</sub>), 26.4 (m, P(CH<sub>3</sub>)<sub>3</sub>), 30.9 (s, *o*-*i*Pr-CH), 34.2 (s, *p*-*i*Pr-CH), 117.5 (br. m, *p*-BAR<sup>F</sup><sub>4</sub>-C), 121.6 (s, *m*-C<sub>trip</sub>), 124.9 (q, CF<sub>3</sub>, <sup>1</sup>J<sub>19F-13C</sub> = 272 Hz), 129.5 (br. q, *m*-BAR<sup>F</sup><sub>4</sub>-C, <sup>2</sup>J<sub>19F-13C</sub> = 31.5 Hz), 130.0 (s, *m*-C<sub>6</sub>H<sub>3</sub>), 130.7 (s, *p*-C<sub>6</sub>H<sub>3</sub>), 132.2 (s, *i*-C<sub>trip</sub>), 135.0 (s, *o*-BAR<sup>F</sup><sub>4</sub>-C), 142.2 (s, *o*-C<sub>6</sub>H<sub>3</sub>), 147.9 (s, *o*-C<sub>trip</sub>), 150.5 (s, *p*-C<sub>trip</sub>), 162.4 (q, *i*-BAR<sup>F</sup><sub>4</sub>-C, <sup>1</sup>J<sub>13C-11B</sub> = 49.8 Hz), 162.7 (m, *i*-C<sub>6</sub>H<sub>3</sub>-Ge). <sup>19</sup>F{<sup>1</sup>H} [564.69 MHz, 299.20 K, benzene-d<sub>6</sub> + *o*-DFB]:  $\delta$  (ppm) –62.4 (s, CF<sub>3</sub>). <sup>31</sup>P{<sup>1</sup>H} [161.97 MHz, 299.20 K, benzene-d<sub>6</sub> + *o*-DFB]:  $\delta$  (ppm) –43.2 (br. s, PMe<sub>3</sub>).

Synthesis of [TbbSnIrH(PMe<sub>3</sub>)<sub>3</sub>][BAR<sup>F</sup><sub>4</sub>] (**4**). TbbSn(Br)=IrH(PMe<sub>3</sub>)<sub>3</sub> (**2**) (167 mg, 156  $\mu$ mol, 1.0 equiv) and Na[BAR<sup>F</sup><sub>4</sub>] (131 mg, 148  $\mu$ mol, 0.95 equiv) are weighed in and mixed up. Subsequently *o*-DFB (1.00 mL) and benzene (1.00 mL) is added, and the resulting dark brown suspension is stirred for five minutes at room temperature. The reaction mixture is filtered through a syringe filter, then the filter is washed with benzene (1.00 mL) and the dark brown solution is dried under reduced pressure. The resulting solid is co-evaporated with *n*-pentane (2.00 mL), washed four times with *n*-pentane (2.00 mL each time) and dried under reduced pressure to yield 243 mg (131  $\mu$ mol, 88 %) brown solid of [TbbSnIrH(PMe<sub>3</sub>)<sub>3</sub>][BAR<sup>F</sup><sub>4</sub>] (**4**). Crystals for X-ray diffraction could be obtained out of a concentrated *o*-DFB solution layered with *n*-pentane at –38 °C. *Analytical data.* <sup>1</sup>H [400.11 MHz, 299.20 K, benzene-d<sub>6</sub> + *o*-DFB]:  $\delta$  (ppm) –11.32 (q + sat., 1H, IrH, <sup>2</sup>J<sub>31P-H</sub> = 10.3 Hz, <sup>2</sup>J<sub>119Sn-H</sub> = 119 Hz), 0.08 (s, 36H, Si(CH<sub>3</sub>)<sub>3</sub>), 1.19 (s, 9H, <sup>t</sup>Bu-H), 1.40 (br. m, 27H, PMe<sub>3</sub>-H), 1.75 (s, 2H, CH(SiMe<sub>3</sub>)<sub>2</sub>), 6.81 (s, 2H, *m*-TbbH), 7.63 (br. s, 4H, *p*-BAR<sup>F</sup><sub>4</sub>-H), 8.31 (br. m, 8H, *o*-BAR<sup>F</sup><sub>4</sub>-H). <sup>11</sup>B [96.29 MHz, 299.20 K, benzene-d<sub>6</sub> + *o*-DFB]:  $\delta$  (ppm) –6.0 (s, BAR<sup>F</sup><sub>4</sub>). <sup>13</sup>C{<sup>1</sup>H} [100.62 MHz, 299.20 K, benzene-d<sub>6</sub> + *o*-DFB]:  $\delta$  (ppm) 0.0 (s, Si(CH<sub>3</sub>)<sub>3</sub>), 27.8 (m, P(CH<sub>3</sub>)<sub>3</sub>), 30.3 (s, <sup>t</sup>Bu-CH<sub>3</sub>), 31.8 (s, CH(SiMe<sub>3</sub>)<sub>2</sub>), 34.7 (s, <sup>t</sup>Bu-CMe<sub>3</sub>), 117.5 (m, *p*-BAR<sup>F</sup><sub>4</sub>-C), 123.5 (s, *m*-C<sub>Tbb</sub>), 124.9 (q, CF<sub>3</sub>, <sup>1</sup>J<sub>19F-13C</sub> = 272 Hz), 129.5 (br. q, *m*-BAR<sup>F</sup><sub>4</sub>-C, <sup>2</sup>J<sub>19F-13C</sub> = 30.5 Hz), 135.0 (s, *o*-BAR<sup>F</sup><sub>4</sub>-C), 145.7 (s, *o*-C<sub>Tbb</sub>), 153.9 (s, *p*-C<sub>Tbb</sub>), 162.4 (q, *i*-BAR<sup>F</sup><sub>4</sub>-C, <sup>1</sup>J<sub>13C-11B</sub> = 49.8 Hz), 177.5 (m, *i*-C<sub>Tbb</sub>-Sn). <sup>19</sup>F{<sup>1</sup>H} [282.38 MHz, 299.20 K, benzene-d<sub>6</sub> + *o*-DFB]:  $\delta$  (ppm) –62.3 (s, CF<sub>3</sub>). <sup>29</sup>Si [59.63 MHz, 299.20 K, benzene-d<sub>6</sub> + *o*-DFB]:  $\delta$  (ppm) 2.6 (m, SiMe<sub>3</sub>). <sup>31</sup>P{<sup>1</sup>H} [161.97 MHz, 299.20 K, benzene-d<sub>6</sub> + *o*-DFB]:  $\delta$  (ppm) –38.5 (br. s + sat., PMe<sub>3</sub>, <sup>2</sup>J<sub>119Sn-31P</sub> = 347 Hz). <sup>119</sup>Sn [111.92 MHz, 299.20 K, benzene-d<sub>6</sub>]:  $\delta$  (ppm) 1424 (br. q, TbbSnIr, <sup>2</sup>J<sub>119Sn-31P</sub> = 349 Hz). <sup>119</sup>Sn{<sup>1</sup>H} [111.92 MHz, 299.20 K, benzene-d<sub>6</sub>]:  $\delta$  (ppm) 1424 (br. q, TbbSnIr, <sup>2</sup>J<sub>119Sn-31P</sub> = 347 Hz). *Elemental analysis* calculated for [TbbSnIrH(PMe<sub>3</sub>)<sub>3</sub>][BAR<sup>F</sup><sub>4</sub>] (C<sub>65</sub>H<sub>89</sub>BF<sub>24</sub>SnIrP<sub>3</sub>Si<sub>4</sub>): C 42.12, H 4.84. Found: C 41.67, H 5.17.

Synthesis of [Ar\*SnIrH(PMe<sub>3</sub>)<sub>3</sub>][BAR<sup>F</sup><sub>4</sub>] (**4'**). *Method A – Step 1:* To a mixture of [Ar\*SnClIrH(PMe<sub>3</sub>)<sub>3</sub>] (20.0 mg, 15.7  $\mu$ mol, 1.0 equiv.) and (Me<sub>3</sub>P)<sub>4</sub>IrH (15.6 mg, 31.4  $\mu$ mol, 2.0 equiv.) benzene (0.50 mL) is added directly. The immediately red colored reaction mixture is stirred at room temperature for two hours. The solvent is removed under reduced pressure and it is co-evaporated with *n*-pentane (1.00 mL) to yield 31.3 mg (29.6  $\mu$ mol, 94 %) of the iridium stannylene Ar\*SnClIrH(PMe<sub>3</sub>)<sub>3</sub> as an red solid. The iridium stannylene was not characterized and the crude product was reacted in the next step as follows: *Method A – Step 2:* To a mixture of Ar\*SnClIrH(PMe<sub>3</sub>)<sub>3</sub> (31.3 mg, 29.6  $\mu$ mol, 1.0 equiv.) and Na[BAR<sup>F</sup><sub>4</sub>] (23.6 mg, 26.6  $\mu$ mol, 0.90 equiv.) benzene (0.30 mL) and *o*-DFB (0.10 mL) is added. The resulting deep red to orange-brown suspension is stirred for five minutes at room temperature. It is then filtered through a syringe filter. The filter is washed again with benzene (0.20 mL). The solvent is removed

under reduced pressure and the resulting gel-like solid is washed three times with *n*-pentane (1.00 mL). The crude product is dissolved in *o*-DFB (0.20 mL), layered with *n*-pentane (2.00 mL) and stored at  $-38\text{ }^{\circ}\text{C}$  to yield 32.8 mg (17.4  $\mu\text{mol}$ , 65 %) red to orange-brown crystals of  $[\text{Ar}^*\text{SnIrH}(\text{PMe}_3)_3][\text{BAR}^{\text{F}_4}]$  (**4'**) as product overnight. The obtained crystals were not suitable for X-ray diffraction.

**Method B:** To a mixture of  $[\text{Ar}^*\text{SnH}]_2$  (22.5 mg, 18.7  $\mu\text{mol}$ , 0.95 equiv.) and  $[\text{Ph}_3\text{C}][\text{BAR}^{\text{F}_4}]$  (41.4 mg, 37.4  $\mu\text{mol}$ , 1.9 equiv.) *o*-DFB (1.00 mL) is added directly. The reaction mixture is stirred at room temperature for five minutes till an orange clear solution is obtained. Subsequently the formed cation  $[\text{Ar}^*\text{Sn}(\text{o-DFB})][\text{BAR}^{\text{F}_4}]$  is added directly to  $(\text{Me}_3\text{P})_4\text{IrH}$  (19.6 mg, 39.4  $\mu\text{mol}$ , 2.0 equiv.). The solvent of the resulting deep brown solution is removed under reduced pressure. The resulting oil is washed with *n*-pentane (3 $\times$ 1.00 mL) to yield 61.9 mg (32.8  $\mu\text{mol}$ , 88 %) deep brown solid of  $[\text{Ar}^*\text{SnIrH}(\text{PMe}_3)_3][\text{BAR}^{\text{F}_4}]$  (**4'**) was obtained as product. For crystallization the solid is dissolved in *o*-DFB (0.30 mL), layered with *n*-pentane (2.00 mL) and stored at  $-38\text{ }^{\circ}\text{C}$ . 39.2 mg (20.8  $\mu\text{mol}$ , 56 %) of deep brown crystals of  $[\text{Ar}^*\text{SnIrH}(\text{PMe}_3)_3][\text{BAR}^{\text{F}_4}]$  (**4'**) were obtained as product. These crystals were not suitable for X-ray diffraction. Via both methods A and B, small amounts of two or three minor products were observed, which could not be identified. Neither washing nor crystallization led to a purification. **Analytical data.**  $^1\text{H}$  [600.13 MHz, 299.20 K, benzene- $\text{d}_6$  + *o*-DFB]:  $\delta$  (ppm)  $-13.61$  (q + sat., 1H, IrH,  $^2J_{\text{Sn-H}} = 127\text{ Hz}$ ,  $^2J_{31\text{P-H}} = 11.4\text{ Hz}$ ), 1.04 (d, 12H, *o*-*i*Pr-CH<sub>3</sub>,  $^3J_{\text{H-H}} = 6.8\text{ Hz}$ ), 1.18 (m, 27H, PMe<sub>3</sub>-H), 1.23 (d, 12H, *o*-*i*Pr-CH<sub>3</sub>,  $^3J_{\text{H-H}} = 6.8\text{ Hz}$ ), 1.24 (d, 12H, *p*-*i*Pr-CH<sub>3</sub>,  $^3J_{\text{H-H}} = 6.8\text{ Hz}$ ), 2.80 (sept, 4H, *o*-*i*Pr-CH,  $^3J_{\text{H-H}} = 6.8\text{ Hz}$ ), 2.81 (sept, 2H, *p*-*i*Pr-CH,  $^3J_{\text{H-H}} = 6.8\text{ Hz}$ ), 7.07 and 7.27 (m [d + t], 3H, *m*-C<sub>6</sub>H<sub>3</sub> und *p*-C<sub>6</sub>H<sub>3</sub>,  $^3J_{\text{H-H}} = 7.7\text{ Hz}$ ), 7.13 (s, 4H, *m*-H<sub>trip</sub>), 7.63 (br. s, 4H, *p*-BAR<sup>F<sub>4</sub></sup>-H), 8.32 (br. m, 8H, *o*-BAR<sup>F<sub>4</sub></sup>-H).  $^{11}\text{B}\{^1\text{H}\}$  [192.55 MHz, 299.20 K, benzene- $\text{d}_6$  + *o*-DFB]:  $\delta$  (ppm)  $-6.0$  (s, BAR<sup>F<sub>4</sub></sup>).  $^{13}\text{C}\{^1\text{H}\}$  [150.90 MHz, 299.20 K, benzene- $\text{d}_6$  + *o*-DFB]:  $\delta$  (ppm) 23.6 (s, *p*-*i*Pr-CH<sub>3</sub>), 23.8 (s, *o*-*i*Pr-CH<sub>3</sub>), 24.4 (s, *o*-*i*Pr-CH<sub>3</sub>), 27.9 (m, P(CH<sub>3</sub>)<sub>3</sub>), 30.7 (s, *o*-*i*Pr-CH), 34.1 (s, *p*-*i*Pr-CH), 117.5 (br. m, *p*-BAR<sup>F<sub>4</sub></sup>-C), 121.9 (s, *m*-C<sub>trip</sub>), 124.9 (q, CF<sub>3</sub>,  $^1J_{19\text{F-}^{13}\text{C}} = 272\text{ Hz}$ ), 129.5 (br. q, *m*-BAR<sup>F<sub>4</sub></sup>-C,  $^2J_{19\text{F-}^{13}\text{C}} = 31.5\text{ Hz}$ ), 129.9 (s, *p*-C<sub>6</sub>H<sub>3</sub>), 130.4 (s, *m*-C<sub>6</sub>H<sub>3</sub>), 132.8 (s, *i*-C<sub>trip</sub>), 135.0 (s, *o*-BAR<sup>F<sub>4</sub></sup>-C), 142.4 (s, *o*-C<sub>6</sub>H<sub>3</sub>), 148.0 (s, *o*-C<sub>trip</sub>), 150.7 (s, *p*-C<sub>trip</sub>), 162.4 (q, *i*-BAR<sup>F<sub>4</sub></sup>-C,  $^1J_{^{13}\text{C-}^{11}\text{B}} = 49.8\text{ Hz}$ ), 179.0 (m, *i*-C<sub>6</sub>H<sub>3</sub>-Sn).  $^{19}\text{F}\{^1\text{H}\}$  [564.69 MHz, 299.20 K, benzene- $\text{d}_6$  + *o*-DFB]:  $\delta$  (ppm)  $-62.3$  (s, CF<sub>3</sub>).  $^{31}\text{P}\{^1\text{H}\}$  [161.97 MHz, 299.20 K, benzene- $\text{d}_6$  + *o*-DFB]:  $\delta$  (ppm)  $-39.2$  (br., PMe<sub>3</sub>).  $^{119}\text{Sn}\{^1\text{H}\}$  [223.79 MHz, 299.20 K, benzene- $\text{d}_6$  + *o*-DFB]:  $\delta$  (ppm) 1076 (q, Ar\*SnIr,  $^2J_{^{119}\text{Sn-}^{31}\text{P}} = 491\text{ Hz}$ ).

**Synthesis of  $[\text{TbbGe}(\text{NH}_2)\text{IrH}_2(\text{PMe}_3)_3][\text{BAR}^{\text{F}_4}]$  (**5**).**  $[\text{TbbGeIrH}(\text{PMe}_3)_3][\text{BAR}^{\text{F}_4}]$  (**1**) (30.0 mg, 16.6  $\mu\text{mol}$ , 1.0 equiv) is dissolved in benzene( $\text{-d}_6$ ) (0.30 mL) and *o*-DFB (0.05 mL) and the dark red solution is transferred into a *J. Young* NMR tube. The solution is degassed with one “freeze-pump-thaw” cycle and the atmosphere is changed with ammonia, whereby the solution becomes colorless immediately. The compound is characterized via NMR spectroscopy, where a quantitative reaction can be observed. For crystallization the solvent is removed under reduced pressure and the resulting colorless solid is dissolved in *o*-DFB. Subsequently the concentrated solution is layered with *n*-pentane at  $-38\text{ }^{\circ}\text{C}$  to yield 24.3 mg (13.5  $\mu\text{mol}$ , 81 %) colorless crystals of  $[\text{TbbGe}(\text{NH}_2)\text{IrH}_2(\text{PMe}_3)_3][\text{BAR}^{\text{F}_4}]$  (**5**) overnight, which were suitable for X-ray diffraction. **Analytical data.**  $^1\text{H}$  [400.11 MHz, 299.20 K, benzene- $\text{d}_6$  + *o*-DFB]:  $\delta$  (ppm)  $-12.80$  (m, 2H, IrH), 0.06 (s, 18H, Si(CH<sub>3</sub>)<sub>3</sub>), 0.11 (s, 18H, Si(CH<sub>3</sub>)<sub>3</sub>), 1.23 (s, 9H, <sup>t</sup>Bu-H), 1.25 (m, 9H, PMe<sub>3</sub>-H), 1.27 (m, 18H, PMe<sub>3</sub>-H), 1.29 (s, 2H, CH(SiMe<sub>3</sub>)<sub>2</sub>), 4.56 (br., 2H, NH<sub>2</sub>), 6.78 (s, 2H, *m*-TbbH), 7.63 (br. s, 4H, *p*-BAR<sup>F<sub>4</sub></sup>-H), 8.32 (br. m, 8H, *o*-BAR<sup>F<sub>4</sub></sup>-H).  $^{11}\text{B}$  [96.29 MHz, 299.20 K, benzene- $\text{d}_6$  + *o*-DFB]:  $\delta$  (ppm)  $-6.0$  (s, BAR<sup>F<sub>4</sub></sup>).  $^{13}\text{C}\{^1\text{H}\}$  [100.62 MHz, 299.20 K, benzene- $\text{d}_6$  + *o*-DFB]:  $\delta$  (ppm) 0.4 (s, Si(CH<sub>3</sub>)<sub>3</sub>), 0.6 (s, Si(CH<sub>3</sub>)<sub>3</sub>), 23.5 (m, P(CH<sub>3</sub>)<sub>3</sub>), 23.8 (m, P(CH<sub>3</sub>)<sub>3</sub>), 30.6 (s, <sup>t</sup>Bu-CH<sub>3</sub>), 31.6 (s, CH(SiMe<sub>3</sub>)<sub>2</sub>), 34.2 (s, <sup>t</sup>Bu-CMe<sub>3</sub>), 117.5 (br. m, *p*-BAR<sup>F<sub>4</sub></sup>-C), 121.8 (s, *m*-C<sub>Tbb</sub>), 124.9 (q, CF<sub>3</sub>,  $^1J_{19\text{F-}^{13}\text{C}} = 273\text{ Hz}$ ), 129.5 (br. q, *m*-BAR<sup>F<sub>4</sub></sup>-C,  $^2J_{19\text{F-}^{13}\text{C}} = 31.5\text{ Hz}$ ), 135.0 (s, *o*-BAR<sup>F<sub>4</sub></sup>-C), 143.2 (s, *i*-C<sub>Tbb</sub>-Ge), 145.6 (s, *o*-C<sub>Tbb</sub>), 153.1 (s, *p*-C<sub>Tbb</sub>), 162.4 (q, *i*-BAR<sup>F<sub>4</sub></sup>-C,  $^1J_{^{13}\text{C-}^{11}\text{B}} = 49.8\text{ Hz}$ ).  $^{19}\text{F}\{^1\text{H}\}$  [376.48 MHz, 299.20 K, benzene- $\text{d}_6$  + *o*-DFB]:  $\delta$  (ppm)  $-62.3$  (s, CF<sub>3</sub>).  $^{29}\text{Si}$  [59.63 MHz, 299.20 K, benzene- $\text{d}_6$  + *o*-DFB]:  $\delta$  (ppm) 3.5 (m, SiMe<sub>3</sub>), 4.2 (m, SiMe<sub>3</sub>).  $^{31}\text{P}\{^1\text{H}\}$  [161.97 MHz, 299.20 K, benzene- $\text{d}_6$  + *o*-DFB]:  $\delta$  (ppm)  $-62.3$  (d, 2x PMe<sub>3</sub>,  $^2J_{31\text{P-}^{31}\text{P}} = 20.7\text{ Hz}$ ),  $-53.8$  (t, 1x PMe<sub>3</sub>,

$^2J_{31P-31P} = 20.7$  Hz). **Elemental analysis** calculated for  $[TbbGe(NH_2)IrH_2(PMe_3)_3][BAR^F_4]$  ( $C_{65}H_{92}BF_{24}GeIrNP_3Si_4$ ): C 42.79, H 5.08, N 0.77. Found: C 43.16, H 4.64, N 0.52.

Reaction of **4** with an excess  $NH_3$  (**6\***).  $[TbbSnIrH(PMe_3)_3][BAR^F_4]$  (**4**) (31.1 mg, 16.8  $\mu$ mol, 1.0 equiv) is dissolved in benzene- $d_6$  (0.30 mL) and *o*-DFB (0.05 mL) and the dark brown solution is transferred into a *J. Young* NMR tube. The solution is degassed with one "freeze-pump-thaw" cycle and the atmosphere is changed with ammonia, whereby the solution becomes orange immediately. After 30 minutes a red oil precipitates and the solution becomes yellow. The compound is characterized via NMR spectroscopy, where a quantitative reaction can be observed. **Analytical data.**  $^1H$  [400.11 MHz, 299.20 K, benzene- $d_6$  + *o*-DFB]:  $\delta$  (ppm) -13.67 (m + sat., 2H, *IrH*,  $^2J_{Sn-H} = 242$  Hz), 0.08 (br. s, 18H,  $Si(CH_3)_3$ ), 0.10 (br. s, 18H,  $Si(CH_3)_3$ ), 1.25 (s, 9H,  $^tBu-H$ ), 1.28 (br., 2H, possibly  $NH_2$ , under  $PMe_3$ ), 1.29 (m, 18H,  $PMe_3-H$ ), 1.32 (m, 9H,  $PMe_3-H$ ), 1.99 (s, 2H,  $CH(SiMe_3)_2$ ), 6.77 (br. s, 2H, *m*- $TbbH$ , under *o*-DFB), 7.62 (br. s, 4H, *p*- $BAR^F-H$ ), 8.28 (br. m, 8H, *o*- $BAR^F-H$ ).  $^{11}B$  [96.29 MHz, 299.20 K, benzene- $d_6$  + *o*-DFB]:  $\delta$  (ppm) -6.0 (s,  $BAR^F_4$ ).  $^{13}C\{^1H\}$  [100.62 MHz, 299.20 K, benzene- $d_6$  + *o*-DFB]:  $\delta$  (ppm) -0.1 (s,  $Si(CH_3)_3$ ), 0.8 (s,  $Si(CH_3)_3$ ), 24.8 (m,  $P(CH_3)_3$ ), 24.9 (m,  $P(CH_3)_3$ ), 30.6 (s,  $^tBu-CH_3$ ), 31.1 (s,  $CH(SiMe_3)_2$ ), 33.9 (s,  $^tBu-CMe_3$ ), 117.5 (br. m, *p*- $BAR^F-C$ ), 122.5 (s, *m*- $C_{Tbb}$ ), 124.9 (q,  $CF_3$ ,  $^1J_{19F-13C} = 272$  Hz), 129.5 (br. q, *m*- $BAR^F-C$ ,  $^2J_{19F-13C} = 31.3$  Hz), 135.0 (s, *o*- $BAR^F-C$ ), 144.5 (br. s, *i*- $C_{Tbb-Sn}$ ), 149.2 (*o*- $C_{Tbb}$ , under *o*-DFB), 150.9 (s, *p*- $C_{Tbb}$ ), 162.3 (q, *i*- $BAR^F-C$ ,  $^1J_{13C-11B} = 49.8$  Hz).  $^{19}F\{^1H\}$  [376.48 MHz, 299.20 K, benzene- $d_6$  + *o*-DFB]:  $\delta$  (ppm) -62.3 (s,  $CF_3$ ).  $^{29}Si$  [59.63 MHz, 299.20 K, benzene- $d_6$  + *o*-DFB]:  $\delta$  (ppm) 1.4 (m,  $SiMe_3$ ), 2.2 (m,  $SiMe_3$ ).  $^{31}P\{^1H\}$  [161.97 MHz, 299.20 K, benzene- $d_6$  + *o*-DFB]:  $\delta$  (ppm) -60.9 (d + sat., 2x  $PMe_3$ ,  $^2J_{119Sn-31P} = 135$  Hz,  $^2J_{31P-31P} = 16.6$  Hz), -50.1 (t + sat., 1x  $PMe_3$ ,  $^2J_{119Sn-31P} = 1827$  Hz,  $^2J_{31P-31P} = 16.6$  Hz).  $^{119}Sn$  [111.92 MHz, 299.20 K, benzene- $d_6$  + *o*-DFB]:  $\delta$  (ppm) -11 (br. d,  $TbbSn(NH_2)Ir$ ,  $^2J_{119Sn-31P} = 1831$  Hz).  $^{119}Sn\{^1H\}$  [111.92 MHz, 299.20 K, benzene- $d_6$  + *o*-DFB]:  $\delta$  (ppm) -11 (br. d,  $^2J_{119Sn-31P} = 1827$  Hz). **Elemental analysis** calculated for  $[TbbSn(NH_2)NH_3IrH_2(PMe_3)_3][BAR^F_4]$  ( $C_{65}H_{95}BF_{24}SnIrN_2P_3Si_4$ ): C 41.36, H 5.07, N 1.48. Found: C 41.29, H 4.60, N 0.66.

Synthesis of  $[TbbGe(NH_2)IrH_2(PMe_3)_3][BAR^F_4]$  (**7**).  $[TbbGeIrH(PMe_3)_3][BAR^F_4]$  (**1**) (32.4 mg, 17.9  $\mu$ mol, 1.0 equiv) is dissolved in benzene (0.30 mL) and *o*-DFB (0.30 mL). Subsequently  $N_2H_4$  solution (17.9  $\mu$ L, 1 M in thf, 17.9  $\mu$ mol, 1.0 equiv) is added and the dark red suspension discolors immediately. The pale yellow solution is dried under reduced pressure. The resulting solid is co-evaporated with *n*-pentane (1.00 mL) and then washed with *n*-pentane (1.00 mL) to yield 30.9 mg colorless solid of  $[TbbGe(NH_2)IrH_2(PMe_3)_3][BAR^F_4]$  (**7**) (16.8  $\mu$ mol, 94 %). Crystals for X-ray diffraction could be obtained out of a concentrated *o*-DFB solution layered with *n*-pentane at -38 °C. **Analytical data.**  $^1H$  [400.11 MHz, 299.20 K, benzene- $d_6$  + *o*-DFB]:  $\delta$  (ppm) -13.03 (m, 2H, *IrH*), 0.05 (s, 18H,  $Si(CH_3)_3$ ), 0.10 (s, 18H,  $Si(CH_3)_3$ ), 1.23 (s, 9H,  $^tBu-H$ ), 1.27 (m, 9H,  $PMe_3-H$ ), 1.28 (s, 2H,  $CH(SiMe_3)_2$ ), 1.35 (m, 18H,  $PMe_3-H$ ), 2.95 (br. s, 2H,  $NH_2$ ), 6.44 (br. m, 1H,  $NH$ ), 6.78 (s, 2H, *m*- $TbbH$ ), 7.64 (br. s, 4H, *p*- $BAR^F-H$ ), 8.33 (br. m, 8H, *o*- $BAR^F-H$ ).  $^{11}B$  [96.29 MHz, 299.20 K, benzene- $d_6$  + *o*-DFB]:  $\delta$  (ppm) -6.0 (s,  $BAR^F_4$ ).  $^{13}C\{^1H\}$  [100.62 MHz, 299.20 K, benzene- $d_6$  + *o*-DFB]:  $\delta$  (ppm) 0.5 (s,  $Si(CH_3)_3$ ), 0.7 (s,  $Si(CH_3)_3$ ), 24.0 (m,  $P(CH_3)_3$ ), 24.3 (m,  $P(CH_3)_3$ ), 30.6 (s,  $^tBu-CH_3$ ), 31.3 (s,  $CH(SiMe_3)_2$ ), 34.1 (s,  $^tBu-CMe_3$ ), 117.6 (br. m, *p*- $BAR^F-C$ ), 121.8 (s, *m*- $C_{Tbb}$ ), 124.8 (q,  $CF_3$ ,  $^1J_{19F-13C} = 272$  Hz), 129.5 (br. q, *m*- $BAR^F-C$ ,  $^2J_{19F-13C} = 31.3$  Hz), 135.0 (s, *o*- $BAR^F-C$ ), 141.8 (s, *i*- $C_{Tbb-Ge}$ ), 146.1 (s, *o*- $C_{Tbb}$ ), 152.9 (s, *p*- $C_{Tbb}$ ), 162.4 (q, *i*- $BAR^F-C$ ,  $^1J_{13C-11B} = 49.8$  Hz).  $^{19}F\{^1H\}$  [376.48 MHz, 299.20 K, benzene- $d_6$  + *o*-DFB]:  $\delta$  (ppm) -62.3 (s,  $CF_3$ ).  $^{29}Si$  [59.63 MHz, 299.20 K, benzene- $d_6$  + *o*-DFB]:  $\delta$  (ppm) 2.5 (m,  $SiMe_3$ ), 3.4 (m,  $SiMe_3$ ).  $^{31}P\{^1H\}$  [161.97 MHz, 299.20 K, benzene- $d_6$  + *o*-DFB]:  $\delta$  (ppm) -62.3 (d, 2x  $PMe_3$ ,  $^2J_{31P-31P} = 20.0$  Hz), -53.7 (t, 1x  $PMe_3$ ,  $^2J_{31P-31P} = 20.0$  Hz). **IR** [KBr,  $cm^{-1}$ ]  $\nu(Ir-H)$  2036,  $\nu(N-H)$  3332. **Elemental analysis** calculated for  $[TbbGe(NH_2)IrH_2(PMe_3)_3][BAR^F_4]$  ( $C_{65}H_{93}BF_{24}GeIrN_2P_3Si_4$ ): C 42.45, H 5.10, N 1.52. Found: C 42.55, H 4.83, N 1.25.

Synthesis of  $[TbbSn(NH_2)IrH_2(PMe_3)_3][BAR^F_4]$  (**8**).  $[TbbSnIrH(PMe_3)_3][BAR^F_4]$  (**2**) (33.2 mg, 17.9  $\mu$ mol, 1.0 equiv) is dissolved in benzene (0.30 mL) and *o*-DFB (0.30 mL). Subsequently  $N_2H_4$  solution (17.9  $\mu$ L,

1 M in thf, 17.9  $\mu\text{mol}$ , 1.0 equiv) is added and the dark brown suspension discolors over ten minutes to a pale yellow. After another ten minutes the pale yellow solution is dried under reduced pressure. The resulting solid is washed with *n*-pentane (2 x 1.00 mL) to yield 30.5 mg colorless solid of  $[\text{TbbSn}(\text{NHNH}_2)\text{IrH}_2(\text{PMe}_3)_3][\text{BAR}^{\text{F}}_4]$  (**8**) (16.2  $\mu\text{mol}$ , 90 %). *Analytical data.*  $^1\text{H}$  [400.11 MHz, 299.20 K, benzene- $\text{d}_6$  + *o*-DFB]:  $\delta$  (ppm) -13.47 (m + sat., 2H, IrH,  $^2J_{\text{Sn-H}} = 251$  Hz), 0.09 (s, 36H, Si(CH $_3$ ) $_3$ ), 0.97 (s, 2H, CH(SiMe $_3$ ) $_2$ ), 1.23 (s, 9H,  $^t\text{Bu-H}$ ), 1.28 (m, 9H, PMe $_3$ -H), 1.37 (m, 18H, PMe $_3$ -H), 3.11 (br., 2H, NH $_2$ ), 3.52 (very br., 1H, possibly NH), 6.83 (s, 2H, *m*-TbbH), 7.64 (br. s, 4H, *p*-BAR $^{\text{F}}$ -H), 8.34 (br. m, 8H, *o*-BAR $^{\text{F}}$ -H).  $^{11}\text{B}$  [96.29 MHz, 299.20 K, benzene- $\text{d}_6$  + *o*-DFB]:  $\delta$  (ppm) -6.0 (s, BAR $^{\text{F}}$  $_4$ ).  $^{13}\text{C}\{^1\text{H}\}$  [100.62 MHz, 299.20 K, benzene- $\text{d}_6$  + *o*-DFB]:  $\delta$  (ppm) 0.4 (s, Si(CH $_3$ ) $_3$ ), 24.7 (m, P(CH $_3$ ) $_3$ ), 25.2 (m, P(CH $_3$ ) $_3$ ), 30.6 (s,  $^t\text{Bu-CH}_3$ ), 34.2 (s,  $^t\text{Bu-CMe}_3$ ), 34.9 (s, CH(SiMe $_3$ ) $_2$ ), 117.6 (br. m, *p*-BAR $^{\text{F}}$ -C), 122.1 (s, *m*-C $_{\text{Tbb}}$ ), 124.9 (q, CF $_3$ ,  $^1J_{19\text{F-}^{13}\text{C}} = 273$  Hz), 129.5 (br. q, *m*-BAR $^{\text{F}}$ -C,  $^2J_{19\text{F-}^{13}\text{C}} = 32.1$  Hz), 135.0 (s, *o*-BAR $^{\text{F}}$ -C), 147.5 (s, *o*-C $_{\text{Tbb}}$ ), 149.8 (m, *i*-C $_{\text{Tbb-Sn}}$ ), 153.1 (s, *p*-C $_{\text{Tbb}}$ ), 162.4 (q, *i*-BAR $^{\text{F}}$ -C,  $^1J_{^{13}\text{C-}^{11}\text{B}} = 49.8$  Hz).  $^{19}\text{F}\{^1\text{H}\}$  [376.48 MHz, 299.20 K, benzene- $\text{d}_6$  + *o*-DFB]:  $\delta$  (ppm) -62.2 (s, CF $_3$ ).  $^{29}\text{Si}$  [59.63 MHz, 299.20 K, benzene- $\text{d}_6$  + *o*-DFB]:  $\delta$  (ppm) 2.9 (m, SiMe $_3$ ).  $^{31}\text{P}\{^1\text{H}\}$  [121.49 MHz, 299.20 K, benzene- $\text{d}_6$  + *o*-DFB]:  $\delta$  (ppm) -60.1 (d + sat., 2x PMe $_3$ ,  $^2J_{^{31}\text{P-}^{31}\text{P}} = 15.9$  Hz,  $^2J_{^{119}\text{Sn-}^{31}\text{P}} = 126$  Hz), -45.5 (t + sat., 1x PMe $_3$ ,  $^2J_{^{31}\text{P-}^{31}\text{P}} = 15.9$  Hz,  $^2J_{^{117}\text{Sn-}^{31}\text{P}} = 1604$  Hz,  $^2J_{^{119}\text{Sn-}^{31}\text{P}} = 1678$  Hz).  $^{119}\text{Sn}$  [111.92 MHz, 299.20 K, benzene- $\text{d}_6$  + *o*-DFB]:  $\delta$  (ppm) 604 (br. d, TbbSn(NHNH $_2$ )Ir,  $^2J_{^{119}\text{Sn-}^{31}\text{P}} = 1682$  Hz).  $^{119}\text{Sn}\{^1\text{H}\}$  [111.92 MHz, 299.20 K, benzene- $\text{d}_6$  + *o*-DFB]:  $\delta$  (ppm) 604 (dt, TbbSn(NHNH $_2$ )Ir,  $^2J_{^{119}\text{Sn-}^{31}\text{P}} = 1682$  Hz,  $^2J_{^{119}\text{Sn-}^{31}\text{P}} = 125$  Hz). **IR** [KBr,  $\text{cm}^{-1}$ ]  $\nu(\text{Ir-H})$  2017,  $\nu(\text{N-H})$  3335. **Elemental analysis** calculated for  $[\text{TbbSn}(\text{NHNH}_2)\text{IrH}_2(\text{PMe}_3)_3][\text{BAR}^{\text{F}}_4]$  (C $_{65}$ H $_{93}$ BF $_{24}$ SnIrN $_2$ P $_3$ Si $_4$ ): C 41.41, H 4.97, N 1.49. Found: C 41.55, H 4.75, N 0.85.

Synthesis of  $[\text{TbbGe}(\text{OH})\text{IrH}_2(\text{PMe}_3)_3][\text{BAR}^{\text{F}}_4]$  (**9**).  $[\text{TbbGeIrH}(\text{PMe}_3)_3][\text{BAR}^{\text{F}}_4]$  (**1**) (29.2 mg, 16.2  $\mu\text{mol}$ , 1.0 equiv) and BaCl $_2$ ·H $_2$ O (7.31 mg, 32.3  $\mu\text{mol}$ , 2.0 equiv) are weighed in and mixed up. Subsequently *o*-DFB (1.00 mL) is added, and the dark red suspension is stirred at ambient temperature for one hour. The suspension becomes colorless and cloudy. The reaction mixture is filtered through a syringe filter and the solvent is removed under reduced pressure. The resulting solid is co-evaporated with *n*-pentane to yield 28.1 mg colorless solid of  $[\text{TbbGe}(\text{OH})\text{IrH}_2(\text{PMe}_3)_3][\text{BAR}^{\text{F}}_4]$  (**9**) (15.4  $\mu\text{mol}$ , 95 %). Crystals for X-ray diffraction could be obtained out of a concentrated *o*-DFB solution layered with *n*-pentane at -38 °C. *Analytical data.*  $^1\text{H}$  [400.11 MHz, 299.20 K, benzene- $\text{d}_6$  + *o*-DFB]:  $\delta$  (ppm) -12.69 (m, 2H, IrH), 0.07 (s, 36H, Si(CH $_3$ ) $_3$ ), 1.19 (s, 9H,  $^t\text{Bu-H}$ ), 1.25 (m, 9H, PMe $_3$ -H), 1.34 (m, 18H, PMe $_3$ -H), 1.36 (s, 2H, CH(SiMe $_3$ ) $_2$ ), 5.29 (d, 1H, OH,  $^4J_{^{31}\text{P-}^1\text{H}} = 3.8$  Hz), 6.79 (s, 2H, *m*-TbbH), 7.62 (br. s, 4H, *p*-BAR $^{\text{F}}$ -H), 8.32 (br. m, 8H, *o*-BAR $^{\text{F}}$ -H).  $^{11}\text{B}$  [96.29 MHz, 299.20 K, benzene- $\text{d}_6$  + *o*-DFB]:  $\delta$  (ppm) -6.0 (s, BAR $^{\text{F}}$  $_4$ ).  $^{13}\text{C}\{^1\text{H}\}$  [100.62 MHz, 299.20 K, benzene- $\text{d}_6$  + *o*-DFB]:  $\delta$  (ppm) 0.2 (s, Si(CH $_3$ ) $_3$ ), 23.4 (m, P(CH $_3$ ) $_3$ ), 23.8 (m, P(CH $_3$ ) $_3$ ), 30.5 (s,  $^t\text{Bu-CH}_3$ ), 32.0 (s, CH(SiMe $_3$ ) $_2$ ), 34.3 (s,  $^t\text{Bu-CMe}_3$ ), 117.6 (m, *p*-BAR $^{\text{F}}$ -C), 122.1 (s, *m*-C $_{\text{Tbb}}$ ), 124.9 (q, CF $_3$ ,  $^1J_{19\text{F-}^{13}\text{C}} = 272$  Hz), 129.5 (br. q, *m*-BAR $^{\text{F}}$ -C,  $^2J_{19\text{F-}^{13}\text{C}} = 31.4$  Hz), 135.0 (s, *o*-BAR $^{\text{F}}$ -C), 145.0 (s, *o*-C $_{\text{Tbb}}$ ), 147.1 (s, *i*-C $_{\text{Tbb-Ge}}$ ), 154.4 (s, *p*-C $_{\text{Tbb}}$ ), 162.4 (q, *i*-BAR $^{\text{F}}$ -C,  $^1J_{^{13}\text{C-}^{11}\text{B}} = 49.8$  Hz).  $^{19}\text{F}\{^1\text{H}\}$  [376.48 MHz, 299.20 K, benzene- $\text{d}_6$  + *o*-DFB]:  $\delta$  (ppm) -62.3 (s, CF $_3$ ).  $^{29}\text{Si}$  [59.63 MHz, 299.20 K, benzene- $\text{d}_6$  + *o*-DFB]:  $\delta$  (ppm) 3.6 (m, SiMe $_3$ ).  $^{31}\text{P}\{^1\text{H}\}$  [161.97 MHz, 299.20 K, benzene- $\text{d}_6$  + *o*-DFB]:  $\delta$  (ppm) -58.7 (d, 2x PMe $_3$ ,  $^2J_{^{31}\text{P-}^{31}\text{P}} = 20.6$  Hz), -51.9 (t, 1x PMe $_3$ ,  $^2J_{^{31}\text{P-}^{31}\text{P}} = 20.6$  Hz). **IR** [KBr,  $\text{cm}^{-1}$ ]  $\nu(\text{Ir-H})$  2051,  $\nu(\text{O-H})$  3593. **Elemental analysis** calculated for  $[\text{TbbGe}(\text{OH})\text{IrH}_2(\text{PMe}_3)_3][\text{BAR}^{\text{F}}_4]$  (C $_{65}$ H $_{91}$ BF $_{24}$ GeIrOP $_3$ Si $_4$ ): C 42.77, H 5.03. Found: C 42.79, H 4.75.

Synthesis of  $[\text{TbbSn}(\text{OH})\text{IrH}_2(\text{PMe}_3)_3][\text{BAR}^{\text{F}}_4]$  (**10**).  $[\text{TbbSnIrH}(\text{PMe}_3)_3][\text{BAR}^{\text{F}}_4]$  (**2**) (40.0 mg, 21.6  $\mu\text{mol}$ , 1.0 equiv) and BaCl $_2$ ·H $_2$ O (9.77 mg, 43.2  $\mu\text{mol}$ , 2.0 equiv) are weighed in and mixed up. Subsequently *o*-DFB (1.00 mL) is added and the dark red suspension is stirred at ambient temperature for two hours. The suspension becomes pale yellow and cloudy. The reaction mixture is filtered through a syringe filter and the solvent is removed under reduced pressure. The resulting solid is co-evaporated with *n*-pentane to yield 39.1 mg pale yellow solid of  $[\text{TbbSn}(\text{OH})\text{IrH}_2(\text{PMe}_3)_3][\text{BAR}^{\text{F}}_4]$  (**10**) (20.9  $\mu\text{mol}$ , 97 %).



Crystals for X-ray diffraction could be obtained out of a concentrated *o*-DFB solution layered with *n*-pentane at  $-38\text{ }^{\circ}\text{C}$ . **Analytical data.**  $^1\text{H}$  [400.11 MHz, 299.20 K, benzene- $d_6$  + *o*-DFB]:  $\delta$  (ppm)  $-13.29$  (m, 2H, IrH),  $0.07$  (s, 36H, Si(CH $_3$ ) $_3$ ),  $1.04$  (s, 2H, CH(SiMe $_3$ ) $_2$ ),  $1.20$  (s, 9H,  $^t\text{Bu-H}$ ),  $1.26$  (m, 9H, PMe $_3$ -H),  $1.37$  (m, 18H, PMe $_3$ -H),  $4.11$  (br. s, 1H, OH),  $6.86$  (s, 2H, *m*-TbbH),  $7.63$  (br. s, 4H, *p*-BAR $^F$ -H),  $8.32$  (br. m, 8H, *o*-BAR $^F$ -H).  $^{11}\text{B}$  [96.29 MHz, 299.20 K, benzene- $d_6$  + *o*-DFB]:  $\delta$  (ppm)  $-6.0$  (s, BAR $^F$ ).  $^{13}\text{C}\{^1\text{H}\}$  [100.62 MHz, 299.20 K, benzene- $d_6$  + *o*-DFB]:  $\delta$  (ppm)  $0.0$  (s, Si(CH $_3$ ) $_3$ ),  $24.4$  (m, P(CH $_3$ ) $_3$ ),  $24.8$  (m, P(CH $_3$ ) $_3$ ),  $30.5$  (s,  $^t\text{Bu-CH}_3$ ),  $34.4$  (s,  $^t\text{Bu-CMe}_3$ ),  $35.2$  (s, CH(SiMe $_3$ ) $_2$ ),  $117.6$  (m, *p*-BAR $^F$ -C),  $122.6$  (s, *m*-C $_{\text{Tbb}}$ ),  $124.9$  (q, CF $_3$ ,  $^1J_{19\text{F}-13\text{C}} = 272$  Hz),  $129.5$  (br. q, *m*-BAR $^F$ -C,  $^2J_{19\text{F}-13\text{C}} = 31.6$  Hz),  $135.0$  (s, *o*-BAR $^F$ -C),  $146.5$  (s, *o*-C $_{\text{Tbb}}$ ),  $154.3$  (s, *p*-C $_{\text{Tbb}}$ ),  $155.4$  (s, *i*-C $_{\text{Tbb}}$ -Sn),  $162.4$  (q, *i*-BAR $^F$ -C,  $^1J_{13\text{C}-11\text{B}} = 49.8$  Hz).  $^{19}\text{F}\{^1\text{H}\}$  [376.48 MHz, 299.20 K, benzene- $d_6$  + *o*-DFB]:  $\delta$  (ppm)  $-62.3$  (s, CF $_3$ ).  $^{29}\text{Si}$  [59.63 MHz, 299.20 K, benzene- $d_6$  + *o*-DFB]:  $\delta$  (ppm)  $2.9$  (m, SiMe $_3$ ).  $^{31}\text{P}\{^1\text{H}\}$  [161.97 MHz, 299.20 K, benzene- $d_6$  + *o*-DFB]:  $\delta$  (ppm)  $-56.3$  (d + sat., 2x PMe $_3$ ,  $^2J_{31\text{P}-31\text{P}} = 15.7$  Hz,  $^2J_{119\text{Sn}-31\text{P}} = 124$  Hz),  $-43.8$  (t, 1x PMe $_3$ ,  $^2J_{31\text{P}-31\text{P}} = 15.7$  Hz,  $^2J_{119\text{Sn}-31\text{P}} = 1714$  Hz).  $^{119}\text{Sn}$  [111.92 MHz, 299.20 K, benzene- $d_6$  + *o*-DFB]:  $\delta$  (ppm)  $648$  (br. m, TbbSn(OH)Ir).  $^{119}\text{Sn}\{^1\text{H}\}$  [111.92 MHz, 299.20 K, benzene- $d_6$  + *o*-DFB]:  $\delta$  (ppm)  $648$  (dt, TbbSn(OH)Ir,  $^2J_{119\text{Sn}-31\text{P}} = 1730$  Hz,  $^2J_{119\text{Sn}-31\text{P}} = 128$  Hz). **IR** [KBr,  $\text{cm}^{-1}$ ]  $\nu(\text{Ir-H})$  2024,  $\nu(\text{O-H})$  3614. **Elemental analysis** calculated for [TbbSn(OH)IrH $_2$ (PMe $_3$ ) $_3$ ][BAR $^F$ ] $_4$  (C $_{65}$ H $_{91}$ BF $_{24}$ SnIrOP $_3$ Si $_4$ ): C 41.72, H 4.90. Found: C 41.45, H 4.84.

Synthesis of [TbbGe(X)IrH $_2$ (PMe $_3$ ) $_3$ ][BAR $^F$ ] $_4$  (**11a**, **11b**). **11a**, **X = Cl**: [TbbGeIrH(PMe $_3$ ) $_3$ ][BAR $^F$ ] $_4$  (**3**) (30.0 mg, 16.6  $\mu\text{mol}$ , 1.0 equiv) is dissolved in *o*-DFB (0.20 mL). Subsequently HCl·OEt $_2$  (8.30  $\mu\text{L}$ , 2 M in diethyl ether, 16.6  $\mu\text{mol}$ , 1.0 equiv) is added and the dark red suspension turns yellow immediately. After five minutes at ambient temperature the yellow solution is dried under reduced pressure. The resulting solid is washed with *n*-pentane (2 x 1.00 mL) to yield 28.6 mg pale yellow solid of [TbbGeClIrH $_2$ (PMe $_3$ ) $_3$ ][BAR $^F$ ] $_4$  (**11a**) (15.5  $\mu\text{mol}$ , 93 %). Suitable crystals for X-ray diffraction could be obtained out of a concentrated *o*-DFB solution layered with *n*-pentane at  $-38\text{ }^{\circ}\text{C}$ . Unfortunately, the crystals were always twinned. **11b**, **X = Br**: TbbGeBrIrH(PMe $_3$ ) $_3$  (**1**) (23.6 mg, 23.1  $\mu\text{mol}$ , 1.0 equiv) is dissolved in benzene- $d_6$  (0.30 mL) and *o*-DFB (0.05 mL). The orange solution is directly added to Brookharts acid ([H(OEt $_2$ ) $_2$ ][BAR $^F$ ] $_4$ ), 22.2 mg, 21.9  $\mu\text{mol}$ , 0.95 equiv) whereby the solution turns yellow immediately. The solvent is removed under reduced pressure and the resulting solid is washed with *n*-pentane (2x1.00 mL) to yield 31.7 mg (16.8  $\mu\text{mol}$ , 77 %) [TbbGe(Br)IrH $_2$ (PMe $_3$ ) $_3$ ][BAR $^F$ ] $_4$  (**11b**) as a pale yellow solid. Via NMR-spectroscopy a purity about 70 % can be determined which is why the synthesis route is not preferred. The following NMR characterization was carried out with the chloride derivative **11a**. **Analytical data.**  $^1\text{H}$  [400.11 MHz, 299.20 K, benzene- $d_6$  + *o*-DFB]:  $\delta$  (ppm)  $-12.21$  (m, 2H, IrH),  $0.12$  (s, 36H, Si(CH $_3$ ) $_3$ ),  $1.21$  (s, 9H,  $^t\text{Bu-H}$ ),  $1.25$  (s, 2H, CH(SiMe $_3$ ) $_2$  under PMe $_3$ ),  $1.27$  (m, 9H, PMe $_3$ -H),  $1.32$  (m, 18H, PMe $_3$ -H),  $6.79$  (s, 2H, *m*-TbbH),  $7.62$  (br. s, 4H, *p*-BAR $^F$ -H),  $8.31$  (br. m, 8H, *o*-BAR $^F$ -H).  $^{11}\text{B}$  [96.29 MHz, 299.20 K, benzene- $d_6$  + *o*-DFB]:  $\delta$  (ppm)  $-6.0$  (s, BAR $^F$ ).  $^{13}\text{C}\{^1\text{H}\}$  [100.62 MHz, 299.20 K, benzene- $d_6$  + *o*-DFB]:  $\delta$  (ppm)  $0.5$  (s, Si(CH $_3$ ) $_3$ ),  $22.3$  (m, P(CH $_3$ ) $_3$ ),  $23.6$  (m, P(CH $_3$ ) $_3$ ),  $30.4$  (s,  $^t\text{Bu-CH}_3$ ),  $32.8$  (s, CH(SiMe $_3$ ) $_2$ ),  $34.3$  (s,  $^t\text{Bu-CMe}_3$ ),  $117.5$  (m, *p*-BAR $^F$ -C),  $122.3$  (s, *m*-C $_{\text{Tbb}}$ ),  $124.9$  (q, CF $_3$ ,  $^1J_{19\text{F}-13\text{C}} = 272$  Hz),  $129.5$  (qm, *m*-BAR $^F$ -C,  $^2J_{19\text{F}-13\text{C}} = 31.4$  Hz),  $135.0$  (s, *o*-BAR $^F$ -C),  $144.6$  (s, *o*-C $_{\text{Tbb}}$ ),  $149.8$  (s, *i*-C $_{\text{Tbb}}$ -Ge),  $154.7$  (s, *p*-C $_{\text{Tbb}}$ ),  $162.4$  (q, *i*-BAR $^F$ -C,  $^1J_{13\text{C}-11\text{B}} = 49.8$  Hz).  $^{19}\text{F}\{^1\text{H}\}$  [376.48 MHz, 299.20 K, benzene- $d_6$  + *o*-DFB]:  $\delta$  (ppm)  $-62.4$  (s, CF $_3$ ).  $^{29}\text{Si}$  [59.63 MHz, 299.20 K, benzene- $d_6$  + *o*-DFB]:  $\delta$  (ppm)  $4.5$  (m, SiMe $_3$ ).  $^{31}\text{P}\{^1\text{H}\}$  [161.97 MHz, 299.20 K, benzene- $d_6$  + *o*-DFB]:  $\delta$  (ppm)  $-57.5$  (d, 2x PMe $_3$ ,  $^2J_{31\text{P}-31\text{P}} = 20.0$  Hz),  $-50.9$  (t, 1x PMe $_3$ ,  $^2J_{31\text{P}-31\text{P}} = 20.0$  Hz). **IR** [KBr,  $\text{cm}^{-1}$ ]  $\nu(\text{Ir-H})$  2031,  $\nu(\text{Ir-H})$  2055. **Elemental analysis** calculated for [TbbGeClIrH $_2$ (PMe $_3$ ) $_3$ ][BAR $^F$ ] $_4$  (C $_{65}$ H $_{90}$ BClF $_{24}$ GeIrP $_3$ Si $_4$ ): C 42.34, H 4.92. Found: C 42.56, H 4.73.

Synthesis of [TbbSn(X)IrH $_2$ (PMe $_3$ ) $_3$ ][BAR $^F$ ] $_4$  (**12a**, **12b**). **12a**, **X = Cl**: [TbbSnIrH(PMe $_3$ ) $_3$ ][BAR $^F$ ] $_4$  (**4**) (30.0 mg, 16.2  $\mu\text{mol}$ , 1.0 equiv) is dissolved in *o*-DFB (0.20 mL). Subsequently HCl·OEt $_2$  (8.09  $\mu\text{L}$ , 2 M in diethyl ether, 16.2  $\mu\text{mol}$ , 1.0 equiv) is added and the dark brown suspension turns yellow immediately. After five minutes at ambient temperature the yellow solution is dried under reduced pressure. The resulting solid is washed with *n*-pentane (2 x 1.00 mL) to yield 28.8 mg pale yellow solid of [TbbSn(Cl)IrH $_2$ (PMe $_3$ ) $_3$ ][BAR $^F$ ] $_4$  (**12a**) (15.2  $\mu\text{mol}$ , 94 %). **12b**, **X = Br**: TbbSn(Br)IrH(PMe $_3$ ) $_3$  (**2**) (24.7 mg,

23.1  $\mu\text{mol}$ , 1.0 equiv) is dissolved in benzene(-d<sub>6</sub>) (0.30 mL) and *o*-DFB (0.05 mL). The red-orange solution is directly added to *Brookharts* acid ([H(OEt<sub>2</sub>)<sub>2</sub>][BAR<sup>F</sup><sub>4</sub>], 22.2 mg, 21.9  $\mu\text{mol}$ , 0.95 equiv) whereby the solution turns yellow immediately. The solvent is removed under reduced pressure and the resulting solid is washed with *n*-pentane (2x2.00 mL). The solid is dissolved in *o*-DFB (0.20 mL), layered with *n*-pentane (2.00 mL) and stored at -38 °C for crystallization to yield 25.7 mg (13.3  $\mu\text{mol}$ , 61 %) [TbbSnBrIrH<sub>2</sub>(PMe<sub>3</sub>)<sub>3</sub>][BAR<sup>F</sup><sub>4</sub>] (**12b**) as a yellow solid. The obtained crystals were suitable for X-ray diffraction. **Elemental analysis** calculated for [TbbSnBrIrH<sub>2</sub>(PMe<sub>3</sub>)<sub>3</sub>][B(Ar<sup>F</sup>)<sub>4</sub>] (C<sub>65</sub>H<sub>90</sub>BBR<sup>F</sup><sub>24</sub>SnIrP<sub>3</sub>Si<sub>4</sub>): C 40.36, H 4.69. Found: C 40.72, H 4.49. The following NMR characterization was carried out with the chloride derivative. **Analytical data.** <sup>1</sup>H [400.11 MHz, 299.20 K, benzene-d<sub>6</sub> + *o*-DFB]:  $\delta$  (ppm) -12.98 (m + sat., 2H, IrH, <sup>2</sup>J<sub>119Sn-H</sub> = 255 Hz), 0.12 (s, 36H, Si(CH<sub>3</sub>)<sub>3</sub>), 0.95 (s, 2H, CH(SiMe<sub>3</sub>)<sub>2</sub>), 1.21 (s, 9H, <sup>t</sup>Bu-H), 1.27 (m, 9H, PMe<sub>3</sub>-H), 1.32 (m, 18H, PMe<sub>3</sub>-H), 6.89 (s, 2H, *m*-TbbH), 7.63 (br. s, 4H, *p*-BAR<sup>F</sup>-H), 8.31 (br. m, 8H, *o*-BAR<sup>F</sup>-H). <sup>11</sup>B [96.29 MHz, 299.20 K, benzene-d<sub>6</sub> + *o*-DFB]:  $\delta$  (ppm) -6.0 (s, BAR<sup>F</sup><sub>4</sub>). <sup>13</sup>C{<sup>1</sup>H} [100.62 MHz, 299.20 K, benzene-d<sub>6</sub> + *o*-DFB]:  $\delta$  (ppm) 0.2 (s, Si(CH<sub>3</sub>)<sub>3</sub>), 23.8 (m, P(CH<sub>3</sub>)<sub>3</sub>), 24.1 (m, P(CH<sub>3</sub>)<sub>3</sub>), 30.5 (s, <sup>t</sup>Bu-CH<sub>3</sub>), 34.5 (s, <sup>t</sup>Bu-CMe<sub>3</sub>), 36.0 (s, CH(SiMe<sub>3</sub>)<sub>2</sub>), 117.6 (br. m, *p*-BAR<sup>F</sup>-C), 123.0 (s, *m*-CTbb), 124.8 (q, CF<sub>3</sub>, <sup>1</sup>J<sub>19F-13C</sub> = 272 Hz), 129.5 (qm, *m*-BAR<sup>F</sup>-C, <sup>2</sup>J<sub>19F-13C</sub> = 31.5 Hz), 135.0 (s, *o*-BAR<sup>F</sup>-C), 146.2 (s, *o*-CTbb), 154.7 (s, *p*-CTbb), 157.4 (s, *i*-CTbb-Sn), 162.4 (q, *i*-BAR<sup>F</sup>-C, <sup>1</sup>J<sub>13C-11B</sub> = 49.8 Hz). <sup>19</sup>F{<sup>1</sup>H} [376.48 MHz, 299.20 K, benzene-d<sub>6</sub> + *o*-DFB]:  $\delta$  (ppm) -62.3 (s, CF<sub>3</sub>). <sup>29</sup>Si [59.63 MHz, 299.20 K, benzene-d<sub>6</sub> + *o*-DFB]:  $\delta$  (ppm) 3.9 (m, SiMe<sub>3</sub>). <sup>31</sup>P{<sup>1</sup>H} [121.49 MHz, 299.20 K, benzene-d<sub>6</sub> + *o*-DFB]:  $\delta$  (ppm) -55.4 (d + sat., 2x PMe<sub>3</sub>, <sup>2</sup>J<sub>31P-31P</sub> = 14.7 Hz, <sup>2</sup>J<sub>Sn-31P</sub> = 132 Hz), -42.5 (t + sat., 1x PMe<sub>3</sub>, <sup>2</sup>J<sub>31P-31P</sub> = 14.7 Hz, <sup>2</sup>J<sub>117Sn-31P</sub> = 1714 Hz, <sup>2</sup>J<sub>119Sn-31P</sub> = 1777 Hz). <sup>119</sup>Sn [111.92 MHz, 299.20 K, benzene-d<sub>6</sub> + *o*-DFB]:  $\delta$  (ppm) 772 (br. d, TbbSnClIr, <sup>2</sup>J<sub>119Sn-31P</sub> = 1785 Hz). <sup>119</sup>Sn{<sup>1</sup>H} [111.92 MHz, 299.20 K, benzene-d<sub>6</sub> + *o*-DFB]:  $\delta$  (ppm) 772 (dt, TbbSnClIr, <sup>2</sup>J<sub>119Sn-31P</sub> = 1784 Hz, <sup>2</sup>J<sub>119Sn-31P</sub> = 126 Hz). **IR** [KBr, cm<sup>-1</sup>]  $\nu$ (Ir-H) 1970,  $\nu$ (Ir-H) 2023. **Elemental analysis** calculated for [TbbSnClIrH<sub>2</sub>(PMe<sub>3</sub>)<sub>3</sub>][BAR<sup>F</sup><sub>4</sub>] (C<sub>65</sub>H<sub>90</sub>BClF<sub>24</sub>SnIrP<sub>3</sub>Si<sub>4</sub>): C 41.31, H 4.80. Found: C 40.82, H 4.44.

Synthesis of [TbbGe(H)IrH<sub>2</sub>(PMe<sub>3</sub>)<sub>3</sub>][BAR<sup>F</sup><sub>4</sub>] (**13**). [TbbGeIrH(PMe<sub>3</sub>)<sub>3</sub>][BAR<sup>F</sup><sub>4</sub>] (**3**) (20.7 mg, 11.5  $\mu\text{mol}$ , 1.0 equiv) is dissolved in benzene(-d<sub>6</sub>) (0.30 mL) and *o*-DFB (0.05 mL) and the dark red solution is transferred into a *J. Young* NMR tube. The solution is degassed with one “freeze-pump-thaw” cycle and the atmosphere is changed with dihydrogen, whereby the solution becomes slightly brighter. After 24 hours at ambient temperature the solution is light yellow. The solvent is removed under reduced pressure. The yellow solid is dissolved in *o*-DFB (0.20 mL), layered with *n*-pentane (2.00 mL) and stored at -38 °C for crystallization. The resulting orange crystals are dried under reduced pressure to yield 18.3 mg of [TbbGe(H)IrH<sub>2</sub>(PMe<sub>3</sub>)<sub>3</sub>][BAR<sup>F</sup><sub>4</sub>] (**13**) (10.1  $\mu\text{mol}$ , 88 %). The obtained crystals were suitable for X-ray diffraction. **Analytical data.** <sup>1</sup>H [400.11 MHz, 299.20 K, benzene-d<sub>6</sub> + *o*-DFB]:  $\delta$  (ppm) -11.90 (m, 2H, IrH), 0.06 (s, 36H, Si(CH<sub>3</sub>)<sub>3</sub>), 1.15 (s, 2H, CH(SiMe<sub>3</sub>)<sub>2</sub>), 1.21 (m, 9H, PMe<sub>3</sub>-H), 1.24 (s, 9H, <sup>t</sup>Bu-H), 1.27 (m, 18H, PMe<sub>3</sub>-H), 6.83 (s, 2H, *m*-TbbH), 7.63 (br. s, 4H, *p*-BAR<sup>F</sup>-H), 8.33 (br. m, 8H, *o*-BAR<sup>F</sup>-H), 13.98 (dt, 1H, GeH, <sup>2</sup>J<sub>31P-1H</sub> = 32.6 Hz, <sup>2</sup>J<sub>31P-1H</sub> = 7.6 Hz). <sup>11</sup>B [96.29 MHz, 299.20 K, benzene-d<sub>6</sub> + *o*-DFB]:  $\delta$  (ppm) -6.0 (s, BAR<sup>F</sup><sub>4</sub>). <sup>13</sup>C{<sup>1</sup>H} [100.62 MHz, 299.20 K, benzene-d<sub>6</sub> + *o*-DFB]:  $\delta$  (ppm) 0.2 (s, Si(CH<sub>3</sub>)<sub>3</sub>), 22.3 (m, P(CH<sub>3</sub>)<sub>3</sub>), 23.9 (m, P(CH<sub>3</sub>)<sub>3</sub>), 30.6 (s, <sup>t</sup>Bu-CH<sub>3</sub>), 31.9 (s, CH(SiMe<sub>3</sub>)<sub>2</sub>), 34.3 (s, <sup>t</sup>Bu-CMe<sub>3</sub>), 117.6 (br. m, *p*-BAR<sup>F</sup>-C), 122.1 (s, *m*-CTbb), 124.9 (q, CF<sub>3</sub>, <sup>1</sup>J<sub>19F-13C</sub> = 273 Hz), 129.5 (br. q, *m*-BAR<sup>F</sup>-C, <sup>2</sup>J<sub>19F-13C</sub> = 31.5 Hz), 135.0 (s, *o*-BAR<sup>F</sup>-C), 144.0 (br. m, *i*-CTbb-Ge), 145.2 (s, *o*-CTbb), 154.1 (s, *p*-CTbb), 162.4 (q, *i*-BAR<sup>F</sup>-C, <sup>1</sup>J<sub>13C-11B</sub> = 49.8 Hz). <sup>19</sup>F{<sup>1</sup>H} [376.48 MHz, 299.20 K, benzene-d<sub>6</sub> + *o*-DFB]:  $\delta$  (ppm) -62.3 (s, CF<sub>3</sub>). <sup>29</sup>Si [59.63 MHz, 299.20 K, benzene-d<sub>6</sub> + *o*-DFB]:  $\delta$  (ppm) 3.0 (m, SiMe<sub>3</sub>). <sup>31</sup>P{<sup>1</sup>H} [161.97 MHz, 299.20 K, benzene-d<sub>6</sub> + *o*-DFB]:  $\delta$  (ppm) -54.0 (d, 2x PMe<sub>3</sub>, <sup>2</sup>J<sub>31P-31P</sub> = 18.7 Hz), -48.8 (t, 1x PMe<sub>3</sub>, <sup>2</sup>J<sub>31P-31P</sub> = 18.7 Hz). **Elemental analysis** calculated for [TbbGeHrH<sub>2</sub>(PMe<sub>3</sub>)<sub>3</sub>][BAR<sup>F</sup><sub>4</sub>] (C<sub>65</sub>H<sub>91</sub>BF<sub>24</sub>GeIrP<sub>3</sub>Si<sub>4</sub>): C 43.15, H 5.07. Found: C 43.13, H 4.82.

Synthesis of [TbbSnIr(μ-H<sub>3</sub>)(PMe<sub>3</sub>)<sub>3</sub>][BAR<sup>F</sup><sub>4</sub>] (**14**). [TbbSnIrH(PMe<sub>3</sub>)<sub>3</sub>][BAR<sup>F</sup><sub>4</sub>] (**4**) (37.0 mg, 20.0  $\mu\text{mol}$ , 1.0 equiv) is dissolved in toluene(-d<sub>8</sub>) (0.10 mL) and *o*-DFB (0.30 mL) and the dark brown solution is transferred into a *J. Young* NMR tube. The solution is degassed with one “freeze-pump-thaw” cycle and the atmosphere is changed with dihydrogen, whereby the solution becomes immediately brighter

and orange to form quantitatively (via NMR spectroscopy)  $[\text{TbbSnIrH}_3(\text{PMe}_3)_3][\text{BAR}^{\text{F}}_4]$  (**14**). The NMR signals were assigned in the reaction mixture at low temperature. *Analytical data.*  $^1\text{H}$  [500.13 MHz, 243.20 K, toluene- $d_8$  + *o*-DFB]:  $\delta$  (ppm)  $-7.94$  (m + sat., 3H, IrH,  $J_{\text{Sn-H}} = 265$  Hz),  $0.10$  (s, 36H,  $\text{Si}(\text{CH}_3)_3$ ),  $0.61$  (s, 2H,  $\text{CH}(\text{SiMe}_3)_2$ ),  $1.30$  (s, 9H,  $^t\text{Bu-H}$ ),  $1.51$  (m, 27H,  $\text{PMe}_3\text{-H}$ ),  $6.96$  (s, 2H, *m*-TbbH),  $7.50$  (br. s, 4H, *p*- $\text{BAR}^{\text{F}}\text{-H}$ ),  $8.33$  (br. m, 8H, *o*- $\text{BAR}^{\text{F}}\text{-H}$ ).  $^{11}\text{B}\{^1\text{H}\}$  [160.46 MHz, 243.20 K, toluene- $d_8$  + *o*-DFB]:  $\delta$  (ppm)  $-6.0$  (s,  $\text{BAR}^{\text{F}}_4$ ).  $^{13}\text{C}\{^1\text{H}\}$  [125.76 MHz, 243.20 K, toluene- $d_8$  + *o*-DFB]:  $\delta$  (ppm)  $0.4$  (s,  $\text{Si}(\text{CH}_3)_3$ ),  $21.9$  (m,  $\text{P}(\text{CH}_3)_3$ ),  $30.8$  (s,  $^t\text{Bu-CH}_3$ ),  $31.8$  (s,  $\text{CH}(\text{SiMe}_3)_2$ ),  $34.1$  (s,  $^t\text{Bu-CMe}_3$ ),  $117.4$  (br. m, *p*- $\text{BAR}^{\text{F}}\text{-C}$ ),  $123.2$  (s, *m*- $\text{CTbb}$ ),  $124.7$  (q,  $\text{CF}_3$ ,  $^1J_{19\text{F-}^{13}\text{C}} = 272$  Hz),  $129.5$  (q, *m*- $\text{BAR}^{\text{F}}\text{-C}$ ,  $^2J_{19\text{F-}^{13}\text{C}} = 31.6$  Hz),  $134.9$  (s, *o*- $\text{BAR}^{\text{F}}\text{-C}$ ),  $147.1$  (s, *o*- $\text{CTbb}$ ),  $152.3$  (s, *p*- $\text{CTbb}$ ),  $162.4$  (q, *i*- $\text{BAR}^{\text{F}}\text{-C}$ ,  $^1J_{^{13}\text{C-}^{11}\text{B}} = 49.8$  Hz),  $173.3$  (s, *i*- $\text{CTbb-Sn}$ ).  $^{19}\text{F}\{^1\text{H}\}$  [282.40 MHz, 299.20 K, toluene- $d_8$  + *o*-DFB]:  $\delta$  (ppm)  $-63.0$  (s,  $\text{CF}_3$ ).  $^{29}\text{Si}$  [99.36 MHz, 243.20 K, toluene- $d_8$  + *o*-DFB]:  $\delta$  (ppm)  $1.9$  (br. m,  $\text{SiMe}_3$ ).  $^{31}\text{P}\{^1\text{H}\}$  [202.46 MHz, 243.20 K, toluene- $d_8$  + *o*-DFB]:  $\delta$  (ppm)  $-45.2$  (s,  $\text{PMe}_3$ ).  $^{119}\text{Sn}$  [186.50 MHz, 243.20 K, toluene- $d_8$  + *o*-DFB]:  $\delta$  (ppm)  $1592$  (br. s, TbbSnIr).

Synthesis of  $[\text{TbbSn}(\text{H})\text{IrH}_2(\text{PMe}_3)_3][\text{BAR}^{\text{F}}_4]$  (**15**).  $[\text{TbbSnIrH}(\text{PMe}_3)_3][\text{BAR}^{\text{F}}_4]$  (**4**) (20.7 mg, 11.2  $\mu\text{mol}$ , 1.0 equiv) is dissolved in benzene- $d_6$  (0.30 mL) and *o*-DFB (0.05 mL) and the dark brown solution is transferred into a *J. Young* NMR tube. The solution is degassed with one “freeze-pump-thaw” cycle and the atmosphere is changed with dihydrogen, whereby the solution becomes immediately brighter and orange to form quantitatively (via NMR spectroscopy)  $[\text{TbbSnIr}(\text{H})_3(\text{PMe}_3)_3][\text{BAR}^{\text{F}}_4]$  (**14**). After one week at ambient temperature compound **14** reacts almost completely to form the main product  $[\text{TbbSn}(\text{H})\text{IrH}_2(\text{PMe}_3)_3][\text{BAR}^{\text{F}}_4]$  (**15**) (about 75 % via  $^1\text{H}$  NMR spectrum) and at least one unknown by-product. The yield was not determined due to these circumstances. The NMR signals were assigned in the reaction mixture. *Analytical data.*  $^1\text{H}$  [400.11 MHz, 299.20 K, benzene- $d_6$  + *o*-DFB]:  $\delta$  (ppm)  $-12.68$  (m, 2H, IrH,  $^2J_{^{119}\text{Sn-H}} = 195$  Hz),  $0.06$  (s, 36H,  $\text{Si}(\text{CH}_3)_3$ ),  $0.64$  (s, 2H,  $\text{CH}(\text{SiMe}_3)_2$ ),  $1.24$  (s, 9H,  $^t\text{Bu-H}$ ),  $1.26$  (m, 9H,  $\text{PMe}_3\text{-H}$ ),  $1.29$  (m, 18H,  $\text{PMe}_3\text{-H}$ ),  $6.89$  (s, 2H, *m*-TbbH),  $7.63$  (br. s, 4H, *p*- $\text{BAR}^{\text{F}}\text{-H}$ ),  $8.30$  (br. m, 8H, *o*- $\text{BAR}^{\text{F}}\text{-H}$ ),  $18.59$  (dt + sat., 1H, SnH,  $^1J_{^{119}\text{Sn-}^1\text{H}} = 772$  Hz,  $^2J_{^{31}\text{P-}^1\text{H}} = 37.5$  Hz,  $^2J_{^{31}\text{P-}^1\text{H}} = 4.7$  Hz).  $^{11}\text{B}$  [96.29 MHz, 299.20 K, benzene- $d_6$  + *o*-DFB]:  $\delta$  (ppm)  $-6.1$  (s,  $\text{BAR}^{\text{F}}_4$ ).  $^{13}\text{C}\{^1\text{H}\}$  [125.76 MHz, 299.20 K, benzene- $d_6$  + *o*-DFB]:  $\delta$  (ppm)  $0.0$  (s,  $\text{Si}(\text{CH}_3)_3$ ),  $23.8$  (m,  $\text{P}(\text{CH}_3)_3$ ),  $24.4$  (m,  $\text{P}(\text{CH}_3)_3$ ),  $30.7$  (s,  $^t\text{Bu-CH}_3$ ),  $34.4$  (s,  $^t\text{Bu-CMe}_3$ ),  $35.0$  (s,  $\text{CH}(\text{SiMe}_3)_2$ ),  $117.6$  (br. m, *p*- $\text{BAR}^{\text{F}}\text{-C}$ ),  $122.4$  (s, *m*- $\text{CTbb}$ ),  $124.8$  (q,  $\text{CF}_3$ ,  $^1J_{19\text{F-}^{13}\text{C}} = 272$  Hz),  $129.5$  (br. q, *m*- $\text{BAR}^{\text{F}}\text{-C}$ ,  $^2J_{19\text{F-}^{13}\text{C}} = 33.1$  Hz),  $135.0$  (s, *o*- $\text{BAR}^{\text{F}}\text{-C}$ ),  $146.8$  (s, *o*- $\text{CTbb}$ ),  $150.3$  (s, *i*- $\text{CTbb-Sn}$ ),  $153.8$  (s, *p*- $\text{CTbb}$ ),  $162.4$  (q, *i*- $\text{BAR}^{\text{F}}\text{-C}$ ,  $^1J_{^{13}\text{C-}^{11}\text{B}} = 49.8$  Hz).  $^{19}\text{F}\{^1\text{H}\}$  [376.48 MHz, 299.20 K, benzene- $d_6$  + *o*-DFB]:  $\delta$  (ppm)  $-62.8$  (s,  $\text{CF}_3$ ).  $^{29}\text{Si}$  [59.63 MHz, 299.20 K, benzene- $d_6$  + *o*-DFB]:  $\delta$  (ppm)  $2.7$  (m,  $\text{SiMe}_3$ ).  $^{31}\text{P}\{^1\text{H}\}$  [121.49 MHz, 299.20 K, benzene- $d_6$  + *o*-DFB]:  $\delta$  (ppm)  $-54.9$  (d + sat., 2x  $\text{PMe}_3$ ,  $^2J_{^{31}\text{P-}^{31}\text{P}} = 15.9$  Hz,  $^2J_{^{119}\text{Sn-}^{31}\text{P}} = 104$  Hz),  $-41.6$  (t + sat., 1x  $\text{PMe}_3$ ,  $^2J_{^{31}\text{P-}^{31}\text{P}} = 15.9$  Hz,  $^2J_{^{119}\text{Sn-}^{31}\text{P}} = 1509$  Hz).  $^{119}\text{Sn}$  [186.50 MHz, 299.20 K, benzene- $d_6$ ]:  $\delta$  (ppm)  $1013$  (dd, TbbSn(H)Ir,  $^2J_{^{119}\text{Sn-}^{31}\text{P}} = 1496$  Hz,  $^1J_{^{119}\text{Sn-}^1\text{H}} = 775$  Hz).  $^{119}\text{Sn}\{^1\text{H}\}$  [186.50 MHz, 299.20 K, benzene- $d_6$ ]:  $\delta$  (ppm)  $1013$  (d, TbbSn(H)Ir,  $^2J_{^{119}\text{Sn-}^{31}\text{P}} = 1504$  Hz).

TbbGeIrH(PMe<sub>3</sub>)<sub>3</sub> (**16**). **Note:** Since the thermodynamic product (TbbGeH)IrH(PMe<sub>3</sub>)<sub>3</sub> already reacts in daylight to the light-induced, kinetic product TbbGe-IrH<sub>2</sub>(PMe<sub>3</sub>)<sub>3</sub> (**17**), work must be carried out largely in the absence of light. **Method A:** To a mixture of (TbbGeBr)IrH(PMe<sub>3</sub>)<sub>3</sub> (**1**) (25.0 mg, 24.4  $\mu\text{mol}$ , 1.0 equiv) and potassium triethylborohydride (3.37 mg, 24.4  $\mu\text{mol}$ , 1.0 equiv) is added directly benzene (0.20 mL). After shaking for one minute the yellow, slightly turbid solution is freed from all volatiles under reduced pressure and it is co-evaporated with *n*-pentane (0.50 mL). The crude product is dissolved in *n*-pentane (1.00 mL) and filtered through a syringe filter. 21.0 mg of a product mixture of (TbbGeH)IrH(PMe<sub>3</sub>)<sub>3</sub> (**16**) and TbbGe-IrH<sub>2</sub>(PMe<sub>3</sub>)<sub>3</sub> (**17**) in a 50:50 ratio is obtained. The assignment of the NMR signals was carried out in the product mixture. **Method B:** Starting from [TbbGeIrH(PMe<sub>3</sub>)<sub>3</sub>][BAR<sup>F</sup><sub>4</sub>] (**3**) (30.0 mg, 16.6  $\mu\text{mol}$ , 1.0 equiv) and potassium triethylborohydride (2.29 mg, 16.6  $\mu\text{mol}$ , 1.0 equiv) in a mixture of benzene (0.30 mL) and *o*-DFB (0.05 mL) at room temperature the product mixture of (TbbGeH)IrH(PMe<sub>3</sub>)<sub>3</sub> (**16**) and TbbGeIrH<sub>2</sub>(PMe<sub>3</sub>)<sub>3</sub> (**17**) can also be prepared. *Analytical data.*  $^1\text{H}$  [600.13 MHz, 273.20 K, toluene- $d_8$ ]:  $\delta$  (ppm)  $-10.79$  (m, 1H, IrH),  $0.35$  (s, 36H,  $\text{Si}(\text{CH}_3)_3$ ),  $1.46$  (s, 9H,  $^t\text{Bu-H}$ ),  $1.58$  (br. m, 27H,  $\text{PMe}_3\text{-H}$ ),  $3.04$  (s, 2H,  $\text{CH}(\text{SiMe}_3)_2$ ),  $6.95$  (s, 2H, *m*-TbbH),

12.04 (dq, 1H, GeH,  $^3J_{31P-H} = 13.6$  Hz,  $^3J_{H-H} = 3.5$  Hz).  $^{13}\text{C}\{^1\text{H}\}$  [150.92 MHz, 273.20 K, toluene- $d_8$ ]:  $\delta$  (ppm) 0.8 (s, Si(CH $_3$ ) $_3$ ), 27.8 (s, CH(SiMe $_3$ ) $_2$ ), 29.0 (br., P(CH $_3$ ) $_3$ ), 31.3 (s,  $^t\text{Bu-CH}_3$ ), 34.1 (s,  $^t\text{Bu-CMe}_3$ ), 120.9 (s,  $m\text{-C}_{\text{Tbb}}$ ), 144.9 (s,  $o\text{-C}_{\text{Tbb}}$ ), 148.2 (s,  $p\text{-C}_{\text{Tbb}}$ ), 153.3 (s,  $i\text{-C}_{\text{Tbb}}\text{-Ge}$ ).  $^{29}\text{Si}$  [119.23 MHz, 273.20 K, toluene- $d_8$ ]:  $\delta$  (ppm) 2.6 (m, SiMe $_3$ ).  $^{31}\text{P}\{^1\text{H}\}$  [242.94 MHz, 273.20 K, toluene- $d_8$ ]:  $\delta$  (ppm) -42.1 (br. s, PMe $_3$ ).

TbbGeIrH $_2$ (PMe $_3$ ) $_3$  (**17**). To a mixture of (TbbGeBr)IrH(PMe $_3$ ) $_3$  (**1**) (22.0 mg, 21.5  $\mu\text{mol}$ , 1.0 equiv) and potassium triethylborohydride (2.97 mg, 21.5  $\mu\text{mol}$ , 1.0 equiv) is added directly benzene (0.20 mL). After shaking for one minute the yellow, slightly turbid solution is freed from all volatiles under reduced pressure. It is co-evaporated with *n*-pentane (0.50 mL). The product mixture is dissolved in *n*-pentane (1.00 mL) and filtered through a syringe filter. The yellow solution is exposed to a blue LED (460 nm) for two hours at room temperature. The light green solution is concentrated to about one-third volume and stored at -38 °C for crystallization to yield 8.50 mg (8.99  $\mu\text{mol}$ , 42 %) light green crystals of TbbGeIrH $_2$ (PMe $_3$ ) $_3$  (**17**) as product. The obtained single crystals were suitable for X-ray diffraction. *Analytical data.*  $^1\text{H}$  [600.13 MHz, 273.20 K, toluene- $d_8$ ]:  $\delta$  (ppm) -11.07 (m, 2H, IrH $_2$ ), 0.18 (s, 2H, CH(SiMe $_3$ ) $_2$ ), 0.38 (s, 36H, Si(CH $_3$ ) $_3$ ), 1.33 (m, 9H, PMe $_3$ -H), 1.42 (m, 18H, PMe $_3$ -H), 1.60 (s, 9H,  $^t\text{Bu-H}$ ), 7.00 (s, 2H,  $m\text{-TbbH}$ ).  $^{13}\text{C}\{^1\text{H}\}$  [150.92 MHz, 273.20 K, toluene- $d_8$ ]:  $\delta$  (ppm) 1.5 (s, Si(CH $_3$ ) $_3$ ), 22.4 (m, P(CH $_3$ ) $_3$ ), 24.8 (s, CH(SiMe $_3$ ) $_2$ ), 27.3 (m, P(CH $_3$ ) $_3$ ), 32.1 (s,  $^t\text{Bu-CH}_3$ ), 33.8 (s,  $^t\text{Bu-CMe}_3$ ), 120.4 (s,  $m\text{-C}_{\text{Tbb}}$ ), 139.1 (s,  $o\text{-C}_{\text{Tbb}}$ ), 149.4 (s,  $p\text{-C}_{\text{Tbb}}$ ), 177.5 (dt, ,  $i\text{-C}_{\text{Tbb}}\text{-Ge}$ ,  $^3J_{31P-13C} = 9.7$  Hz,  $^3J_{31P-13C} = 5.8$  Hz).  $^{29}\text{Si}$  [119.23 MHz, 273.20 K, toluene- $d_8$ ]:  $\delta$  (ppm) 1.9 (m, SiMe $_3$ ).  $^{31}\text{P}\{^1\text{H}\}$  [242.94 MHz, 273.20 K, toluene- $d_8$ ]:  $\delta$  (ppm) -58.8 (d, 2 $\times$ PMe $_3$ ,  $^2J_{31P-31P} = 14.7$  Hz), -30.0 (t, 1 $\times$ PMe $_3$ ,  $^2J_{31P-31P} = 14.7$  Hz). **Elemental analysis** calculated for TbbGe-IrH $_2$ (PMe $_3$ ) $_3$  (C $_{33}$ H $_{78}$ GeIrP $_3$ Si $_4$ ): C 41.94, H 8.32. Found: C 42.27, H 8.31.

Synthesis of TbbSnIrH $_2$ (PMe $_3$ ) $_3$  (**18**). TbbSnH $_3$  (22.0 mg, 38.5  $\mu\text{mol}$ , 1.0 equiv) and benzyl potassium (5.02 mg, 38.5  $\mu\text{mol}$ , 1.0 equiv) are weighed in and tetrahydrofuran (0.50 mL) is added at room temperature. After two minutes the solvent is removed under reduced pressure and the "TbbSnH $_2$ K" anion is dissolved in benzene (0.50 mL) and directly added to (Me $_3$ P) $_4$ IrCl (20.5 mg, 38.5  $\mu\text{mol}$ , 1.0 equiv). The reaction mixture is stirred for one hour at room temperature, while an orange suspension is formed. The solvent is removed under reduced pressure and the resulting solid is co-evaporated with *n*-pentane (1.00 mL). The dark product is extracted with *n*-pentane (1.00 mL) and filtered through a syringe filter. The orange solution is stored at -38 °C for crystallization. The resulting green-yellow crystals are dried under reduced pressure to yield 20.7 mg of TbbSnIrH $_2$ (PMe $_3$ ) $_3$  (**18**) (20.9  $\mu\text{mol}$ , 54 %). Synthesis of **18** is also possible in reaction of **2** or **4** with potassium triethylborohydride. *Analytical data.*  $^1\text{H}$  [400.11 MHz, 299.20 K, benzene- $d_6$ ]:  $\delta$  (ppm) -12.10 (m, 2H, IrH $_2$ ), 0.04 (s, 2H, CH(SiMe $_3$ ) $_2$ ), 0.35 (s, 36H, Si(CH $_3$ ) $_3$ ), 1.33 (br. m, 18H, PMe $_3$ -H), 1.50 (br. m, 9H, PMe $_3$ -H), 1.52 (s, 9H,  $^t\text{Bu-H}$ ), 7.03 (s, 2H,  $m\text{-TbbH}$ ).  $^{13}\text{C}\{^1\text{H}\}$  [100.62 MHz, 299.20 K, benzene- $d_6$ ]:  $\delta$  (ppm) 1.7 (s, Si(CH $_3$ ) $_3$ ), 24.1 (s, PMe $_3$ -CH $_3$ ), 26.3 (s, CH(SiMe $_3$ ) $_2$ ), 29.1 (s, PMe $_3$ -CH $_3$ ), 32.0 (s,  $^t\text{Bu-CH}_3$ ), 33.8 (s,  $^t\text{Bu-CMe}_3$ ), 120.8 (s,  $m\text{-C}_{\text{Tbb}}$ ), 145.0 (s,  $o\text{-C}_{\text{Tbb}}$ ), 149.9 (s,  $p\text{-C}_{\text{Tbb}}$ ), 186.3 (m,  $i\text{-C}_{\text{Tbb}}\text{-Sn}$ ).  $^{29}\text{Si}$  [59.63 MHz, 299.20 K, benzene- $d_6$ ]:  $\delta$  (ppm) 2.1 (m, SiMe $_3$ ).  $^{31}\text{P}\{^1\text{H}\}$  [161.97 MHz, 299.20 K, benzene- $d_6$ ]:  $\delta$  (ppm) -60.9 (d, PMe $_3$ ,  $^2J_{31P-31P} = 12.9$  Hz), 24.4 (t, PMe $_3$ ,  $^2J_{31P-31P} = 12.9$  Hz).  $^{31}\text{P}\{^1\text{H}\}$  [121.49 MHz, 299.20 K, benzene- $d_6$ ]:  $\delta$  (ppm) -60.9 (d + sat., PMe $_3$ ,  $^2J_{119-31P} = 209$  Hz,  $^2J_{31P-31P} = 12.9$  Hz), 24.4 (t + sat., PMe $_3$ ,  $^2J_{119-31P} = 320$  Hz,  $^2J_{31P-31P} = 12.9$  Hz).  $^{119}\text{Sn}$  [111.92 MHz, 299.20 K, benzene- $d_6$ ]:  $\delta$  (ppm) 3835 (br. d, TbbSnIr,  $^2J_{119\text{Sn}-31P} = 327$  Hz).  $^{119}\text{Sn}\{^1\text{H}\}$  [111.92 MHz, 299.20 K, benzene- $d_6$ ]:  $\delta$  (ppm) 3835 (br. d, TbbSnIr,  $^2J_{119\text{Sn}-31P} = 325$  Hz). **IR** [KBr, cm $^{-1}$ ]  $\nu$ (Ir-H) 2018. **Elemental analysis** calculated for TbbSn-IrH $_2$ (PMe $_3$ ) $_3$  (C $_{33}$ H $_{78}$ IrP $_3$ Si $_4$ Sn): C 39.99, H 7.93. Found: C 40.58, H 7.98.

Synthesis of TbbSnIrH $_2$ (PEt $_3$ ) $_3$  (**19**). TbbSnH $_3$  (150 mg, 262  $\mu\text{mol}$ , 1.0 equiv) and benzyl potassium (34.2 mg, 262  $\mu\text{mol}$ , 1.0 equiv) are weighed in and tetrahydrofuran (2.00 mL) is added at room temperature. After two minutes the solvent is removed under reduced pressure and (Et $_3$ P) $_3$ IrCl (153 mg, 262  $\mu\text{mol}$ , 1.0 equiv) dissolved in benzene (2.00 mL) is directly added to the "TbbSnH $_2$ K" anion and the reaction mixture is stirred for three hours at room temperature, while the solution becomes cloudy and dark

orange. The solvent is removed under reduced pressure and the resulting waxy solid is co-evaporated with *n*-pentane (2.00 mL). The dark orange solid is extracted with *n*-pentane (4.00, 4.00, 2.00 mL) and filtered through a syringe filter. Subsequently the dark orange solution is concentrated under reduced pressure till it is oily to be stored at  $-38\text{ }^{\circ}\text{C}$  for crystallization. The resulting yellow crystals are dried under reduced pressure to yield 223 mg of  $\text{TbbSnIrH}_2(\text{PET}_3)_3$  (**19**) (200  $\mu\text{mol}$ , 76 %). The yielded crystals were suitable for X-ray diffraction. *Analytical data.*  $^1\text{H}$  [400.11 MHz, 299.20 K, benzene- $d_6$ ]:  $\delta$  (ppm)  $-13.26$  (m, 2H,  $\text{IrH}_2$ ),  $0.24$  (s, 2H,  $\text{CH}(\text{SiMe}_3)_2$ ),  $0.34$  (s, 36H,  $\text{Si}(\text{CH}_3)_3$ ),  $0.92$  (m, 9H,  $\text{PET}_3\text{-CH}_3$ ),  $0.97$  (m, 18H,  $\text{PET}_3\text{-CH}_3$ ),  $1.52$  (s, 9H,  $^t\text{Bu-H}$ ),  $1.77$  (m, 12H,  $\text{PET}_3\text{-CH}_2$ ),  $1.85$  (m, 6H,  $\text{PET}_3\text{-CH}_2$ ),  $7.06$  (s, 2H,  $m\text{-TbbH}$ ).  $^{13}\text{C}\{^1\text{H}\}$  [100.62 MHz, 299.20 K, benzene- $d_6$ ]:  $\delta$  (ppm)  $1.8$  (s,  $\text{Si}(\text{CH}_3)_3$ ),  $9.0$  (s,  $\text{PET}_3\text{-CH}_3$ ),  $9.4$  (br.,  $\text{PET}_3\text{-CH}_3$ ),  $25.0$  (m,  $\text{PET}_3\text{-CH}_2$ ),  $27.2$  (br. m,  $\text{PET}_3\text{-CH}_2$ ),  $27.7$  (s,  $\text{CH}(\text{SiMe}_3)_2$ ),  $32.0$  (s,  $^t\text{Bu-CH}_3$ ),  $33.8$  (s,  $^t\text{Bu-CMe}_3$ ),  $121.3$  (s,  $m\text{-CTbb}$ ),  $145.3$  (s,  $o\text{-CTbb}$ ),  $149.2$  (s,  $p\text{-CTbb}$ ),  $190.8$  (m,  $i\text{-CTbb-Sn}$ ).  $^{29}\text{Si}$  [59.63 MHz, 299.20 K, benzene- $d_6$ ]:  $\delta$  (ppm)  $1.8$  (m,  $\text{SiMe}_3$ ).  $^{31}\text{P}\{^1\text{H}\}$  [161.97 MHz, 299.20 K, benzene- $d_6$ ]:  $\delta$  (ppm)  $-26.4$  (d,  $\text{PET}_3$ ,  $^2J_{31\text{P-31P}} = 7.5$  Hz),  $62.1$  (t,  $\text{PET}_3$ ,  $^2J_{31\text{P-31P}} = 7.5$  Hz).  $^{119}\text{Sn}$  [111.92 MHz, 299.20 K, benzene- $d_6$ ]:  $\delta$  (ppm)  $3827$  (d,  $\text{TbbSnIr}$ ,  $^2J_{119\text{Sn-31P}} = 458$  Hz).  $^{119}\text{Sn}\{^1\text{H}\}$  [111.92 MHz, 299.20 K, benzene- $d_6$ ]:  $\delta$  (ppm)  $3827$  (d,  $\text{TbbSnIr}$ ,  $^2J_{119\text{Sn-31P}} = 458$  Hz). IR [KBr,  $\text{cm}^{-1}$ ]  $\nu(\text{Ir-H})$  2041. **Elemental analysis** calculated for  $\text{TbbSnIrH}_2(\text{PET}_3)_3$  ( $\text{C}_{42}\text{H}_{96}\text{IrP}_3\text{Si}_4\text{Sn}$ ): C 45.15, H 8.66. Found: C 45.32, H 8.67.

Synthesis of  $\text{TbbSnIrH}_2(\text{CO})(\text{PET}_3)_2$  (**20**).  $\text{TbbSnIrH}_2(\text{PET}_3)_3$  (**19**) (50.5 mg, 45.2  $\mu\text{mol}$ , 1.0 equiv) is dissolved in benzene- $d_6$  (0.40 mL) and transferred into a *J. Young* NMR tube. The solution is degassed with one "freeze-pump-thaw" cycle and the atmosphere is changed with carbon monoxide, whereby the solution suddenly turns turquoise. The solvent is removed under reduced pressure immediately and the resulting solid is co-evaporated with *n*-pentane (1.00 mL) to yield 44.5 mg of  $\text{TbbSnIrH}_2(\text{CO})(\text{PET}_3)_2$  (**20**) as a turquoise solid (43.3  $\mu\text{mol}$ , 96 %). Suitable crystals for X-ray diffraction could be obtained out of a slowly evaporated *n*-pentane solution at  $-38\text{ }^{\circ}\text{C}$ . *Analytical data.*  $^1\text{H}$  [400.11 MHz, 299.20 K, benzene- $d_6$ ]:  $\delta$  (ppm)  $-10.49$  (ddd, 1H,  $\text{IrH}$ ,  $^2J_{31\text{P-H}} = 21.3$  Hz,  $^2J_{31\text{P-H}} = 15.6$  Hz,  $^2J_{\text{H-H}} = 3.7$  Hz),  $-9.83$  (ddd, 1H,  $\text{IrH}$ ,  $^2J_{31\text{P-H}} = 109$  Hz,  $^2J_{31\text{P-H}} = 17.1$  Hz,  $^2J_{\text{H-H}} = 3.7$  Hz),  $0.28$  (s, 2H + 18H,  $\text{CH}(\text{SiMe}_3)_2$  +  $\text{Si}(\text{CH}_3)_3$ ),  $0.37$  (s, 18H,  $\text{Si}(\text{CH}_3)_3$ ),  $0.76$  (m, 9H,  $\text{PET}_3\text{-CH}_3$ ),  $0.94$  (m, 9H,  $\text{PET}_3\text{-CH}_3$ ),  $1.49$  (s, 9H,  $^t\text{Bu-H}$ ),  $1.59$  (m, 6H,  $\text{PET}_3\text{-CH}_2$ ),  $1.89$  (m, 6H,  $\text{PET}_3\text{-CH}_2$ ),  $7.04$  (s, 2H,  $m\text{-TbbH}$ ).  $^{13}\text{C}\{^1\text{H}\}$  [100.62 MHz, 299.20 K, benzene- $d_6$ ]:  $\delta$  (ppm)  $1.2$  (s,  $\text{Si}(\text{CH}_3)_3$ ),  $1.3$  (s,  $\text{Si}(\text{CH}_3)_3$ ),  $7.5$  (s,  $\text{PET}_3\text{-CH}_3$ ),  $8.3$  (s,  $\text{PET}_3\text{-CH}_3$ ),  $21.2$  (m,  $\text{PET}_3\text{-CH}_2$ ),  $24.9$  (m,  $\text{PET}_3\text{-CH}_2$ ),  $27.6$  (s,  $\text{CH}(\text{SiMe}_3)_2$ ),  $31.8$  (s,  $^t\text{Bu-CH}_3$ ),  $34.0$  (s,  $^t\text{Bu-CMe}_3$ ),  $121.5$  (s,  $m\text{-CTbb}$ ),  $145.3$  (s,  $o\text{-CTbb}$ ),  $150.3$  (s,  $p\text{-CTbb}$ ),  $178.9$  (m,  $\text{C}\equiv\text{O}$ ),  $182.7$  (m,  $i\text{-CTbb-Sn}$ ).  $^{29}\text{Si}$  [59.63 MHz, 299.20 K, benzene- $d_6$ ]:  $\delta$  (ppm)  $2.0$  (m,  $\text{SiMe}_3$ ).  $^{31}\text{P}\{^1\text{H}\}$  [161.97 MHz, 299.20 K, benzene- $d_6$ ]:  $\delta$  (ppm)  $-17.1$  (d,  $\text{PET}_3$ ,  $^2J_{31\text{P-31P}} = 10.5$  Hz),  $42.9$  (d + sat.,  $\text{PET}_3$ ,  $^2J_{119\text{Sn-31P}} = 336$  Hz,  $^2J_{31\text{P-31P}} = 10.5$  Hz).  $^{119}\text{Sn}$  [111.92 MHz, 299.20 K, benzene- $d_6$ ]:  $\delta$  (ppm)  $3321$  (d,  $\text{TbbSnIr}$ ,  $^2J_{119\text{Sn-31P}} = 336$  Hz).  $^{119}\text{Sn}\{^1\text{H}\}$  [111.92 MHz, 299.20 K, benzene- $d_6$ ]:  $\delta$  (ppm)  $3321$  (d,  $\text{TbbSnIr}$ ,  $^2J_{119\text{Sn-31P}} = 336$  Hz). IR [KBr,  $\text{cm}^{-1}$ ]  $\nu(\text{CO})$  1964,  $\nu(\text{Ir-H})$  2075. **Elemental analysis** calculated for  $\text{TbbSnIrH}_2(\text{CO})(\text{PET}_3)_2$  ( $\text{C}_{37}\text{H}_{81}\text{IrOP}_2\text{Si}_4\text{Sn}$ ): C 43.26, H 7.95. Found: C 43.43, H 8.04.

Synthesis of  $\text{TbbSnH}_2\text{Ir}(\text{CO})_2(\text{PET}_3)_2$  (**21**).  $\text{TbbSnIrH}_2(\text{PET}_3)_3$  (**19**) (26.0 mg, 23.3  $\mu\text{mol}$ , 1.0 equiv) is dissolved in benzene- $d_6$  (0.40 mL) and transferred into a *J. Young* NMR tube. The solution is degassed with one "freeze-pump-thaw" cycle and the atmosphere is changed with carbon monoxide, whereby the solution suddenly turns turquoise to yield quantitatively  $\text{TbbSnIrH}_2(\text{CO})(\text{PET}_3)_2$  (**20**). After 96 hours the solution is yellow and the solvent is removed under reduced pressure. The resulting waxy solid is co-evaporated with *n*-pentane to yield 22.6 mg pale yellow solid of  $\text{TbbSnH}_2\text{Ir}(\text{CO})_2(\text{PET}_3)_2$  (**21**) (22.6 mg, 21.4  $\mu\text{mol}$ , 92 %). Suitable crystals for X-ray diffraction could be obtained out of a slowly evaporated *n*-pentane solution at  $-38\text{ }^{\circ}\text{C}$  (14.0 mg, 12.3  $\mu\text{mol}$ , 57 %). *Analytical data.*  $^1\text{H}$  [400.11 MHz, 299.20 K, benzene- $d_6$ ]:  $\delta$  (ppm)  $0.39$  (s, 36H,  $\text{Si}(\text{CH}_3)_3$ ),  $0.80$  (m, 18H,  $\text{PET}_3\text{-CH}_3$ ),  $1.40$  (s, 9H,  $^t\text{Bu-H}$ ),  $1.51$  (m, 12H,  $\text{PET}_3\text{-CH}_2$ ),  $2.31$  (s, 2H,  $\text{CH}(\text{SiMe}_3)_2$ ),  $4.70$  (t + sat., 2H,  $\text{SnH}_2$ ,  $^1J_{119\text{Sn-H}} = 1400$  Hz,  $^1J_{117\text{Sn-H}} = 1339$  Hz),  $7.03$  (s, 2H,  $m\text{-TbbH}$ ).  $^{13}\text{C}\{^1\text{H}\}$  [125.76 MHz, 299.20 K, benzene- $d_6$ ]:  $\delta$  (ppm)  $0.9$  (s,  $\text{Si}(\text{CH}_3)_3$ ),  $7.9$  (s,  $\text{PET}_3\text{-CH}_3$ ),  $22.1$  (m,  $\text{PET}_3\text{-CH}_2$ ),  $31.3$  (s,  $^t\text{Bu-CH}_3$ ),  $32.7$  (s,  $\text{CH}(\text{SiMe}_3)_2$ ),  $34.0$  (s,  $^t\text{Bu-CMe}_3$ ),  $120.0$  (s,  $m\text{-CTbb}$ ),  $138.9$  (m,  $i\text{-CTbb-Sn}$ ),  $149.2$  (s,  $p\text{-CTbb}$ ),  $150.9$  (s,  $o\text{-CTbb}$ ),  $187.0$  (s + sat.,  $\text{C}\equiv\text{O}$ ,  $^2J_{119\text{Sn-13C}} = 71.2$  Hz).

$^{29}\text{Si}$  [59.63 MHz, 299.20 K, benzene- $d_6$ ]:  $\delta$  (ppm) 2.8 (m,  $\text{SiMe}_3$ ).  $^{31}\text{P}\{^1\text{H}\}$  [161.97 MHz, 299.20 K, benzene- $d_6$ ]:  $\delta$  (ppm) -16.5 (s + sat.,  $\text{PEt}_3$ ,  $^2J_{^{119}\text{Sn}-^{31}\text{P}} = 320$  Hz,  $^2J_{^{117}\text{Sn}-^{31}\text{P}} = 305$  Hz).  $^{119}\text{Sn}$  [111.92 MHz, 299.20 K, benzene- $d_6$ ]:  $\delta$  (ppm) -388 (tt,  $\text{TbbSnH}_2\text{Ir}$ ,  $^1J_{^{119}\text{Sn}-^1\text{H}} = 1406$  Hz,  $^2J_{^{119}\text{Sn}-^{31}\text{P}} = 320$  Hz).  $^{119}\text{Sn}\{^1\text{H}\}$  [111.92 MHz, 299.20 K, benzene- $d_6$ ]:  $\delta$  (ppm) -388 (t,  $\text{TbbSnH}_2\text{Ir}$ ,  $^2J_{^{119}\text{Sn}-^{31}\text{P}} = 320$  Hz). IR [KBr,  $\text{cm}^{-1}$ ]  $\nu(\text{CO})$  1772,  $\nu(\text{CO})$  1899,  $\nu(\text{Sn-H})$  1959. **Elemental analysis** calculated for  $\text{TbbSnH}_2\text{-Ir}(\text{CO})_2(\text{PEt}_3)_2$  ( $\text{C}_{38}\text{H}_{81}\text{IrO}_2\text{P}_2\text{Si}_4\text{Sn}$ ): C 43.25, H 7.74. Found: C 43.54, H 7.73.

## References

- Field, J. E.; Hill, T. J.; Venkataraman, D., Bridged triarylamines: a new class of heterohelicenes. *The Journal of organic chemistry* **2003**, *68* (16), 6071-6078.
- Nagata, K.; Agou, T.; Tokitoh, N., Syntheses and Structures of Terminal Arylalumylene Complexes. *Angew. Chem., Int. Ed.* **2014**, *53* (15), 3881-3884.
- Sugahara, T.; Guo, J.-D.; Sasamori, T.; Karatsu, Y.; Furukawa, Y.; Ferao, A. E.; Nagase, S.; Tokitoh, N., Reaction of a Stable Digermynes with Acetylenes: Synthesis of a 1,2-Digermabenzene and a 1,4-Digermabarrelene. *Bulletin of the Chemical Society of Japan* **2016**, *89* (11), 1375-1384.
- Auer, M.; Diab, F.; Eichele, K.; Schubert, H.; Wesemann, L., Reactivity of organogermanium and organotin trihydrides. *Dalton Transactions* **2022**.
- Schneider, J.; Sindlinger, C. P.; Eichele, K.; Schubert, H.; Wesemann, L., Low-Valent Lead Hydride and Its Extreme Low-Field  $^1\text{H}$  NMR Chemical Shift. *J. Am. Chem. Soc.* **2017**, *139* (19), 6542-6545.
- Weiß, S.; Schubert, H.; Wesemann, L., Low valent lead hydride chemistry: hydroplumbylation of phenylacetylene and 1,1-dimethylallene. *Chem. Commun.* **2019**, *55* (69), 10238-10240.
- Simons, R. S.; Gallucci, J. C.; Tessier, C. A.; Youngs, W. J., Synthesis and characterization of the sterically hindered iridium(III)-silyl complex:  $(\text{Et}_3\text{P})_3(\text{H})_2\text{Ir}[\text{Si}(\text{H})\text{Cl}(\text{C}_6\text{H}_3\text{-Mes}_2\text{-2,6})]$  and the generation of the cationic iridium(III)-silylene complex:  $[(\text{Et}_3\text{P})_3(\text{H})_2\text{Ir}=\text{Si}(\text{H})(\text{C}_6\text{H}_3\text{-Mes}_2\text{-2,6})][\text{B}(\text{C}_6\text{F}_5)_4]$ . *J. Organomet. Chem.* **2002**, *654* (1), 224-228.
- Herskovitz, T.; Kampe, C.; Kaesz, H. D.; Seidel, W. M., 22. Carbon Dioxide Complexes of Rhodium and Iridium. In *Inorganic Syntheses*, 1982; pp 99-103.
- Bahr, S. R.; Boudjouk, P., Trityl tetrakis [3, 5-bis (trifluoromethyl) phenyl] borate: a new hydride abstraction reagent. *The Journal of Organic Chemistry* **1992**, *57* (20), 5545-5547.
- Brookhart, M.; Grant, B.; Volpe, A. F.,  $[(3,5\text{-(CF}_3)_2\text{C}_6\text{H}_3)_4\text{B}]\text{-[H(OEt}_2)_2]^+$ : a convenient reagent for generation and stabilization of cationic, highly electrophilic organometallic complexes. *Organometallics* **1992**, *11* (11), 3920-3922.
- Robin, K. H.; Edwin, D. B.; Sonia, M. C. d. M.; Robin, G.; Pierre, G., NMR nomenclature. Nuclear spin properties and conventions for chemical shifts(IUPAC Recommendations 2001). *Pure and Applied Chemistry* **2001**, *73* (11), 1795-1818.
- Van Geet, A. L., Calibration of methanol nuclear magnetic resonance thermometer at low temperature. *Analytical Chemistry* **1970**, *42* (6), 679-680.
- Van Geet, A. L., Calibration of the methanol and glycol nuclear magnetic resonance thermometers with a static thermistor probe. *Analytical Chemistry* **1968**, *40* (14), 2227-2229.
- Budzelaar, P. H. M. *gNMR 5.0.6*, Ivory Soft: 2006.
- Binsch, G.; Kessler, H., The Kinetic and Mechanistic Evaluation of NMR Spectra. New analytical methods (18). *Angew. Chem., Int. Ed.* **1980**, *19* (6), 411-428.
- Farrugia, L., ORTEP-3 for Windows - a version of ORTEP-III with a Graphical User Interface (GUI). *Journal of Applied Crystallography* **1997**, *30* (5 Part 1), 565.
- Farrugia, L., WinGX suite for small-molecule single-crystal crystallography. *Journal of Applied Crystallography* **1999**, *32* (4), 837-838.
- Farrugia, L., WinGX and ORTEP for Windows: an update. *J. Appl. Crystallogr.* **2012**, *45* (4), 849-854.
- Hubschle, C. B.; Sheldrick, G. M.; Dittrich, B., ShelXle: a Qt graphical user interface for SHELXL. *Journal of Applied Crystallography* **2011**, *44* (6), 1281-1284.
- Sheldrick, G. M., SHELXL-97. *Program for crystal-structure refinement*. University of Göttingen, Germany. **1997**.
- Sheldrick, G. M., A short history of SHELX. *Acta Crystallographica Section A: Foundations of Crystallography* **2008**, *64* (1), 112-122.
- Sheldrick, G. M., Sadabs. University of Göttingen, Germany Program for Empirical Absorption Correction of Area Detector Data: 1996.
- Thorn, D. L.; Tulip, T. H., Syntheses and reactions of a cationic hydrido(hydroxymethyl)iridium complex. The crystal and molecular structure of

hydrido(hydroxymethyl)tetrakis(trimethylphosphine)iridium(III) hexafluorophosphate,  $[\text{IrH}(\text{CH}_2\text{OH})(\text{PMe}_3)_4][\text{PF}_6]$ . *Organometallics* **1982**, 1 (12), 1580-1586.
